# 1 **Distinct contributions of tensile and shear stress on E-cadherin levels during** 2 **morphogenesis**

3 Girish R. Kale<sup>1,2</sup>, Xingbo Yang<sup>3,4</sup>, Jean-Marc Philippe<sup>1</sup>, Madhav Mani<sup>3</sup>, Pierre-François Lenne<sup>1,\*</sup>,  
4 Thomas Lecuit<sup>1,5,\*</sup>

5  
6 1. Aix Marseille Université, CNRS, IBDM - UMR7288, 13009 Marseille, France.

7 2. National Center for Biological Sciences, GKVK campus, Bellary road, Bangalore, India.

8 3. Northwestern University, 2145 Sheridan Road, Evanston, IL 60208, USA.

9 4. Department of Molecular and Cellular Biology, Harvard University, Cambridge, MA 02138,  
10 USA

11 5. Collège de France, 11 Place Marcelin Berthelot, 75005 Paris, France.

12 \* Authors for correspondence

13

## 14 **Abstract**

15 Epithelial tissues are highly dynamic. During embryonic morphogenesis cell contacts are  
16 constantly remodeled. This stems from active contractile forces that work against adhesive  
17 forces at cell interfaces. E-cadherin complexes play a pivotal role in this process as they both  
18 support inter-molecular adhesive forces and transmit mechanical tension due to their  
19 coupling to the cortical contractile actomyosin networks. In this context, it is unclear how  
20 tensile forces affect E-cadherin adhesion complexes and junction dynamics.

21

22 Addressing this calls for methods to estimate the tensile forces (load) experienced by  
23 adhesion complexes themselves. We address this during the early morphogenesis of the  
24 *Drosophila* embryonic ectoderm. Tensile forces generated by Myosin-II in the apico-medial  
25 cortex (medial Myosin-II) and in the junctional cortex (junctional Myosin-II) are responsible  
26 for junction remodeling. We combined mechanical inference and laser ablations to map  
27 tension at cell junctions. We also established the ratio between Vinculin and E-cadherin  
28 intensities as a ratiometric readout that measures the load at adhesion complexes.

29 Combining these tools, we show that the tension generated in both medial and junction  
30 pools of Myosin-II imposes load on E-cadherin adhesion complexes. Medial Myosin-II loads  
31 adhesion complexes on all junctions of a cell and increases levels of E-cadherin. Junctional  
32 Myosin-II, on the other hand, biases the distribution of the load between junctions of the  
33 same cell and exerts shear forces, which decrease the levels of E-cadherin.

34

35 This work highlights the difference between medial Myosin-II and junctional Myosin-II in  
36 regulating E-cadherin levels during junction remodeling and suggests distinct effects of shear  
37 versus tensile stresses on E-cadherin complexes and on the dynamics of adhesive cell  
38 contacts.

39

40

## 41 Introduction

42 Tissue scale morphogenetic movements are driven by the dynamic remodeling of cell-cell  
43 adhesion and contractile actomyosin cytoskeleton at cell interfaces<sup>1-4</sup>. E-cadherin based cell  
44 adhesion machinery is not uniformly distributed at the cell interfaces. Within adherens  
45 junctions, E-cadherin forms *cis*- and *trans*-homophilic clusters whose size, density and lateral  
46 mobility (flow) depend, in part, on coupling to F-actin<sup>5-7</sup>. E-cadherin cell adhesion complexes  
47 are physically linked to the actomyosin cytoskeleton by  $\alpha$ -Catenin and Vinculin, two F-actin  
48 binding proteins<sup>8-13</sup>. Such coupling to F-actin is essential for determining E-cadherin cluster  
49 size and number, underlying adhesion maturation, cell-cell cohesion<sup>14,15</sup>, epithelial integrity  
50 *in vivo*<sup>9</sup> and cell sorting behavior<sup>16</sup>. Importantly, E-cadherin coupling to F-actin via  $\alpha$ -Catenin  
51 is dependent on force:  $\alpha$ -Catenin's interaction with F-actin can be modeled as a two-state  
52 catch bond, where force shifts the complex to a strongly bound-state<sup>11</sup> potentially by a  
53 tension-induced conformational change<sup>10,17-20</sup>. This argues that actomyosin-generated  
54 tension reinforces coupling to E-cadherin complexes *in vivo*<sup>21,22</sup>. By virtue of trans-  
55 homophilic interactions, E-cadherin complexes transmit these tensile forces across  
56 actomyosin cortices of neighboring cells<sup>16</sup>. The link between actomyosin contractility and E-  
57 cadherin may promote the regulation of cell adhesion by actomyosin contraction during  
58 tissue morphogenesis, though this possibility has not yet been directly addressed in a  
59 developmental context.

60  
61 E-cadherin based cell adhesion plays a dual role by both maintaining tissue cohesion and by  
62 facilitating tissue remodeling under biochemical and mechanical regulation<sup>23-26</sup>. Contractile  
63 forces can affect cell adhesion, as they can directly influence the recruitment or turnover of  
64 E-cadherin molecules<sup>27</sup>. However, the evidence is sometimes contradictory, in some  
65 instances tension stabilizes E-cadherin, while in others tension appears to have the opposite  
66 effect. Mammalian cell culture experiments have demonstrated that cells respond to cell  
67 extrinsic tensile forces through local reorganization of F-actin cytoskeleton and increased  
68 recruitment or stabilization of E-cadherin<sup>12,13,18,20</sup>. However, other experiments have  
69 demonstrated that E-cadherin levels are reduced due to signaling downstream of Src and  
70 that the contractile activity of Myosin-II is the transducer of this reduction<sup>28</sup>. In addition,  
71 higher junctional tension correlates with increased turnover rate of E-cadherin molecules in  
72 MDCK cells<sup>29</sup>, which in turn depends on the endocytosis/exocytosis of E-cadherin<sup>30</sup>, arguing  
73 for tension reducing E-cadherin levels. Whether mechanical load regulates E-cadherin based  
74 adhesion *in vivo* has been comparatively little explored<sup>31,32</sup>.

75  
76 We addressed this question during the early development of *Drosophila* embryonic  
77 ectoderm, which undergoes convergent-extension movements<sup>33</sup>. These movements rely on  
78 cell intercalation, which involves disassembly of junctions oriented along the dorsal-ventral  
79 axis (DV, vertical junctions) of the embryo, followed by elongation of new junctions along the  
80 anterior-posterior axis (AP, transverse junctions)<sup>34-36</sup>. Ectodermal cells have two distinctly  
81 regulated pools of Myosin-II that are responsible for persistent junction shrinkage as well as  
82 elongation<sup>36-38</sup>. First, a pulsatile pool of medial Myosin-II produces semi-periodic  
83 contractions in the apical cortex, and junctional Myosin-II produces anisotropic contractions  
84 along vertical junctions. Junctions experience tension of distinct orientation due to Myosin-II  
85 contractions in these different actomyosin pools (Supplementary Fig. 1A). Indeed, junctional  
86 actomyosin ablation causes relaxation along the axis of the junction<sup>37,39,40</sup> indicating that  
87 tension is parallel to the junction (Supplementary Fig. 1A'). Medial actomyosin ablation

88 causes relaxation of the junction away from the ablation, perpendicular to the axis of the  
89 junction<sup>36,41</sup>, indicating that the tension is normal to the junction (Supplementary Fig. 1A’').  
90 It is believed that these two pools cumulatively generate polarized tension at cell junctions,  
91 such that vertical junctions are under greater tension than the transverse junctions. Indeed,  
92 tension at cell junctions is planar polarized as measured by laser ablation of actomyosin  
93 cortices<sup>39</sup> and by optical tweezers<sup>42</sup>. However, the measured tension is defined at the scale  
94 of a whole junction. It is unclear how this junction-level tension translates at the level of E-  
95 cadherin molecules to which actomyosin networks are coupled. Further, it is unknown  
96 whether the respective actomyosin contraction contributions from the medial and the  
97 junctional networks is transmitted to E-cadherin molecules in a different manner. Lastly, it  
98 remains unresolved whether the impact of the respective contributions of the medial and  
99 junctional actomyosin networks on E-cadherin recruitment is distinct.

100  
101 In this study, we have investigated the effect of actomyosin contractility on cell adhesion,  
102 through the analysis of the load exerted onto E-cadherin. Based on previous studies, Myosin-  
103 II activation by phosphorylation of its regulatory light chain can be directly inferred from its  
104 recruitment<sup>43</sup>. Thus, we used changes in Myosin-II recruitment as a proxy for changes in its  
105 activation and for the changes in the generation of tensile forces themselves. Myosin-II  
106 phosphorylation depends on the kinase Rok, which is activated by the small GTPase Rho1.  
107 Medial activation of Rho1 depends on Gα12/13 (also called *Concertina*) and its molecular  
108 effector, the GEF RhoGEF2<sup>38</sup>. Thus Gα12/13 and RhoGEF2 control medial apical actomyosin  
109 tension by specifically regulating apical actomyosin recruitment. We analyzed the  
110 contribution of medial and junctional actomyosin networks to the load on adhesion  
111 complexes and to the recruitment of E-cadherin during morphogenesis of the embryonic  
112 ectoderm. Our analysis leads us to consider the differential role of tensile and shear stresses  
113 exerted respectively by the medial and junctional actomyosin networks.

114

## 115 **Results**

### 116 ***Drosophila* Vinculin is recruited at adhesion complexes via α-Catenin in a Myosin-II 117 dependent manner**

118 In mammalian cells, Vinculin is recruited at E-cadherin adhesion complexes via its binding  
119 with α-Catenin<sup>10,12,19</sup>. We asked whether a similar phenomenon occurs in *Drosophila*  
120 embryonic ectoderm. We first verified that Vinculin is a component of E-cadherin-based  
121 adhesion complexes. Figure 1A shows E-cadherin clusters (arrowheads) co-localizing with  
122 Vinculin clusters. This point is qualitatively supported by the similarities in the intensity  
123 profiles for Vinculin and E-cadherin in a zoom-in view of a junction (Fig. 1B). To test whether  
124 α-Catenin is required for the recruitment of Vinculin to adhesion complexes, we injected  
125 embryos with double-stranded RNA (dsRNA) to achieve an RNAi mediated knockdown of α-  
126 Catenin (see Methods). α-Catenin knockdown significantly reduced Vinculin density at cell-  
127 cell contacts (Fig. 1C, C’), implying that α-Catenin is the primary interactor of Vinculin and  
128 facilitates Vinculin recruitment in adhesion complexes. Further, Vinculin was enriched in the  
129 apico-lateral domain of ectodermal cells similar to E-cadherin and Myosin-II (Supplementary  
130 Fig. 1B-E). With these observations, we conclude that Vinculin is a *bona fide* component of  
131 adhesion complexes in *Drosophila*, similar to its mammalian homologs.

132

133 We observed that Vinculin was enriched on vertical junctions compared to transverse  
134 junctions in the embryonic ectoderm (Supplementary Fig. 1I, I’). This distribution strikingly

135 mirrored that of Myosin-II (Supplementary Fig. 1H, H'), which is known to be planar polarized  
136 <sup>34,44,45</sup>. This is remarkable since E-cadherin, however, is present at a lower concentration on  
137 vertical junctions <sup>35,41</sup>. Thus, Vinculin distribution was opposite to that of E-cadherin or  $\alpha$ -  
138 Catenin, which are enriched on transverse junctions relative to vertical junctions  
139 (Supplementary Fig. 1F-G'). Vinculin planar polarized distribution was lost in the absence of  
140  $\alpha$ -Catenin (Fig. 1C''). These results suggest a differential role of adhesion and contractility in  
141 regulating Vinculin recruitment and distribution.

142  
143 The tensile forces generated by Myosin-II are known to produce structural changes in  $\alpha$ -  
144 Catenin that expose a cryptic binding site for Vinculin and enhance the recruitment of  
145 Vinculin to adhesion complexes <sup>10,18,19</sup>. Thus, inhibiting Myosin-II activity can result in a  
146 reduction in the junctional recruitment of Vinculin. We tested this idea by injecting in  
147 embryos a Rok inhibitor, to block the Myosin-II activity (see Methods). Rok inhibition  
148 significantly reduced Myosin-II recruitment at junctions and abolished its planar polarity (Fig.  
149 1D-D''). The same treatment also reduced Vinculin line densities on all junctions (Fig. 1E, E').  
150 Noticeably, it inverted the planar polarized distribution of Vinculin, which became similar to  
151 that of E-cadherin (Fig. 1E''). Rok inhibition also reduced E-cadherin density at junctions and  
152 amplified its planar polarity (Fig. 1F-F''). Given that Vinculin co-localizes with E-cadherin, we  
153 asked if the inversion of Vinculin planar polarity was due to a constitutive localization of  
154 Vinculin to E-cadherin in the absence of Myosin-II activity. When we normalized junctional  
155 Vinculin density to that of E-cadherin, the Vinc/E-cad ratio, indeed, this ratio was reduced  
156 upon Rok inhibition and its planar polarity was lost (Fig. 1G-G'') in a manner similar to  
157 Myosin-II. The fact that the planar polarity of Vinc/E-cad ratio qualitatively parallels that of  
158 Myosin-II suggests that the recruitment of Vinculin to adhesion complexes is enhanced by  
159 Myosin-II activity.

160  
161 We further tested this by calculating the linear correlation coefficient between junctional  
162 Vinculin density and E-cadherin density. The correlation was performed by binning junctions  
163 according to their length. We term it the 'conditional correlation' (see Methods and  
164 Supplementary Fig. 2A). Such a measurement avoids the indirect correlation between the  
165 mean junctional densities, as they are proportional to the inverse of junctional length. The  
166 correlation was consistently strong in Rok inhibited embryos independent of junction length  
167 (Supplementary Fig. 2B and C), indicating a constitutive association between Vinculin and E-  
168 cadherin in the absence of Myosin-II activity. In the presence of Myosin-II activity, the  
169 correlation between Vinculin and E-cadherin line densities was stronger on shorter junctions  
170 (Supplementary Fig. 2B and C). This suggests that Myosin-II activity enhances Vinculin  
171 recruitment to adhesion complexes at shrinking junctions.

172  
173 Taken together, these results indicate that Vinculin is recruited to adhesion complexes at low  
174 levels independent of Myosin-II activity. In the presence of Myosin-II activity, Vinculin  
175 recruitment is enhanced further. In light of these observations, we decided to normalize  
176 Vinculin density with that of E-cadherin to specifically focus on the Myosin-II activity-  
177 dependent recruitment of Vinculin to E-cadherin.

### 178 179 **The ratio of Vinculin to E-cadherin densities correlates with junctional tension**

180 We then tested if Vinculin recruitment and Vinc/E-cad ratio are dependent on junctional  
181 tension, as this recruitment requires a force dependent structural changes in  $\alpha$ -Catenin. Such

182 function is postulated for *Drosophila* Vinculin<sup>31,46</sup>, but has not been demonstrated using  
183 explicit tension estimates.

184  
185 In order to estimate tension distribution, we used and compared two methods of tension  
186 estimation; first, ‘mechanical inference’ method<sup>47–49</sup>, which uses segmented cell networks to  
187 compute relative tensions along junctions within an image (see methods and Supplementary  
188 Fig. 3A); and second, laser ablations method<sup>36,37,39–41,50,51</sup>, where post-ablation initial recoil  
189 velocity acts as a proxy for tension on junctions (see methods and Supplementary Fig. 3B).  
190 We first applied mechanical inference to our tissue of interest. Figure 2A shows a snapshot  
191 from a wild type embryo where cell junctions are visualized using E-cadherin-GFP signal.  
192 Figure 2B shows the corresponding junctional skeleton, on which we implemented  
193 mechanical inference. Figure 2C shows the corresponding output of inferred tension from  
194 mechanical inference, where the thickness of the junction is proportional to the inferred  
195 tension. Note that the mechanical inference captures the tension cables along vertical  
196 junctions, which were reported to be under higher tension<sup>39,40</sup>. The planar polarity of  
197 inferred tension (Fig. 2D) showed a trend similar to that of junctional Myosin-II and  
198 previously described tension distribution.

199  
200 We further asked which tension estimate, inferred tension or recoil velocity, correlates better  
201 with the Vinc/E-cad ratio. We performed laser ablation experiments and found positive and  
202 statistically significant correlation between pre-ablation Vinc/E-cad ratio and post-ablation  
203 initial recoil velocity (Fig. 2E), although the extent of correlation was low. Vinc/E-cad ratio  
204 and inferred tension (Fig. 2F), post ablation recoil velocity and inferred tension  
205 (Supplementary Fig. 3C) show a similar extent of correlation on the same pre-ablation  
206 snapshots, indicating that all three tension estimates are comparable. Given that we are  
207 pooling individual data points from different embryos, the low correlation could be an effect  
208 of embryo-to-embryo variability. To test this, we plotted Vinc/E-cad ratio against inferred  
209 tension for all junctions from a single snapshot within an embryo and found a strong  
210 correlation between Vinc/E-cad ratio and inferred tension (Fig. 2G). Note that a plot like the  
211 one in Figure 2G is difficult to obtain in laser ablation experiments, since laser ablations are  
212 performed one junction at a time. Therefore, we decided to use mechanical inference as the  
213 primary estimate of tension which yields relative tensions across all images of embryos.

214  
215 Then, we compared the correlations between inferred tension and molecular markers to  
216 junction, namely Vinc/E-cad ratio, Vinculin density and junctional Myosin-II density using  
217 mechanical inference. We first performed ‘conditional correlation’ by binning junctions based  
218 on their length to avoid artificial correlation induced by variation of junctional length (see  
219 Methods and Supplementary Fig. 2D). We found that Vinc/E-cad ratio correlates better with  
220 inferred tension than Vinculin and Myosin II density (Fig. 2H, I). To avoid spatial variations  
221 induced by fluctuation of laser intensities, we also calculated the ‘local correlation’ with  
222 inferred tension by binning junctions based on their corresponding cells (see Methods and  
223 Supplementary Fig. 2A). In such analysis, the inferred tension strongly correlated with  
224 junctional Myosin-II density, as the median local correlation coefficient was 0.6 for wild-type  
225 embryos and drops to 0.2 for Rok inhibited embryos. (Fig. 2J), validating mechanical  
226 inference once again. The Vinc/E-cad ratio also showed strong correlation with inferred  
227 tension in a manner similar to junctional Myosin-II, as the median correlation coefficient was  
228 0.6 in wild-type embryos and 0.14 after Rok inhibition (Fig. 2K). Further, although the median

229 correlation coefficient between Vinculin density and inferred tension was 0.56 for the wild-  
230 type embryos, the correlation was negative (-0.25) for Rok inhibited embryos (Fig. 2L), which  
231 was consistent with the inversion of Vinculin planar polarized distribution upon Rok  
232 inhibition (Fig. 1E''). With these quantifications we concluded that Vinc/E-cad ratio strongly  
233 correlates with junctional tension in the presence of Myosin-II activity and that Vinc/E-cad  
234 ratio correlates better with tension than Vinculin intensity alone.

235  
236 To corroborate the results above, we turned to laser ablation experiments again. We found  
237 that both junctional Myosin-II density and Vinc/E-cad ratio showed a statistically significant  
238 correlation with recoil velocity (Supplementary Fig. 3D and Fig. 2E). Further, the correlation  
239 between recoil velocity and Vinculin density (Supplementary Fig. 3E) was weaker than that  
240 between recoil velocity and Vinc/E-cad ratio. Finally, there was no correlation between the  
241 recoil velocity and E-cadherin density (Supplementary Fig. 3F), indicating the specificity of  
242 the analysis.

243  
244 Altogether, our data indicated that the distribution of Vinc/E-cad ratio can be used as a  
245 ratiometric readout for the distribution of junctional tension.

#### 247 **The ratio of Vinculin to E-cadherin densities reflects mechanical load on adhesion** 248 **complexes**

249 Mechanical inference and laser ablations provide an estimate for the junctional tension, a  
250 macroscopic quantity that is assumed to be uniform along the junction. E-cadherin adhesion  
251 complexes, on the other hand, are distributed in clusters along the junction (Fig. 1A and  
252 Supplementary Fig. 1F, G). Adhesion complexes, composed of E-cadherin,  $\beta$ -Catenin and  $\alpha$ -  
253 Catenin, mechanically resist the contractile forces from actomyosin. Thus, adhesion  
254 complexes could be under differently oriented contractile forces and resist different  
255 magnitude of mechanical loads as they couple independently to the actomyosin network.  
256 Vinculin can be an estimate of the mechanical load experienced by each adhesion complex,  
257 as individual molecules of Vinculin are recruited to  $\alpha$ -Catenin, in a load dependent manner  
258 <sup>17,52</sup>. Given that Vinc/E-cad ratio correlates with 'junctional tension' (a macroscopic quantity),  
259 we asked if it can be a readout of the mechanical load at adhesion complexes (a microscopic  
260 quantity), potentially providing access to forces at a sub-junctional level.

261  
262 We address this question by over-expressing E-cadherin to increase its junctional level. The E-  
263 cadherin over-expression is expected to reduce the number of Myosin-II molecules per E-  
264 cadherin molecule, thereby reducing the load per adhesion complex. Vinculin level is hence  
265 expected to decrease relative to E-cadherin due to a reduction of tension supported by each  
266 E-cadherin molecule in the adhesion clusters (Fig. 3A). Indeed, E-cadherin over-expression  
267 produced a mild, but significant, increase in its junctional density (Fig. 3B, B'), while the  
268 distribution of Myosin-II was unchanged (Fig. 3E-E''). The junctional tension was also  
269 unchanged as shown by recoil velocities after laser ablations (Supplementary Fig. 4A).  
270 Concomitantly, there was a reduction in Vinculin density on all junctions (Fig. 3C, C''), leading  
271 to an even stronger decrease in Vinc/E-cad ratio (Fig. 3D, D'). We suggest that the decrease in  
272 Vinculin levels is not due to junctional tension or Myosin-II, as both quantities are unaffected  
273 by E-cadherin over-expression, but a response to the decrease of the load per adhesion  
274 complex (see Fig. 3A).

275

276 Moreover, Vinc/E-cad ratio can be calculated at a sub-junctional scale, even at a scale as  
277 small as individual adhesion clusters. Therefore, we further asked if we can see a consistent  
278 change in Vinc/E-cad ratio at a sub-junctional scale. Pixels in an image are the smallest  
279 possible spatial scale available in our analysis. So, we estimated Vinc/E-cad ratio at individual  
280 pixels (see Methods and Supplementary Fig. 5). Vinc/E-cad ratio was higher at brighter E-cad  
281 clusters, suggesting that the mechanical load is inhomogeneous at the sub-junctional level,  
282 brighter E-cad clusters bearing larger loads than dim ones. Upon E-cadherin over-expression,  
283 we observed a reduction in Vinc/E-cad ratio across all E-cadherin pixel intensity bins (Fig. 3F).  
284 This is consistent with the idea that the load bore by adhesion clusters is dependent on the  
285 number of clusters and their sizes (number of molecules per cluster), both of which are  
286 known to be dependent on E-cadherin total amount <sup>5</sup>.

287  
288 These quantifications suggest that, Vinc/E-cad ratio at each adhesion complex can be used as  
289 a proxy for the 'load on adhesion complex'. We note that Vinc/E-cad is independent of  
290 junctional length, thus can be estimated at a microscopic scale of adhesion clusters and will  
291 act as a ratiometric readout of load at E-cadherin adhesion complexes.

292  
293 **Medial and junctional Myosin-II distinctly load E-cadherin adhesion complexes**  
294 E-cadherin adhesion complexes are mechanically coupled to two spatially separated and  
295 distinctly regulated pools of Myosin-II, the medial pool and the junctional pool <sup>37,38,43</sup>. The  
296 relaxation kinetics of actomyosin cortex in laser ablation experiments suggest that medial  
297 Myosin-II exerts tension that is predominantly orthogonal to cell contacts, whereas  
298 junctional Myosin-II exerts tension that is predominantly parallel to cell contacts <sup>37,39,41</sup>. As  
299 the forces produced by these two pools are differently oriented towards the junctions, we  
300 asked whether they distinctly load adhesion complexes. First, we inhibited Myosin-II activity  
301 globally (Rok inhibition). This treatment reduced the levels of Vinc/E-cad ratio, and  
302 suppressed its planar polarity (Fig. 4A-B'), consistent with the idea that Myosin-II activity is  
303 required to load the adhesion complexes. Next, we tuned the Myosin-II activation in the  
304 medial pool only. A recent study demonstrated that a Gα12/13-RhoGEF2-Rho1-Rok pathway  
305 phosphorylates and activates Myosin-II in the medial pool downstream of GPCR signaling <sup>38</sup>.  
306 Using RhoGEF2-RNAi, we reduced the activation of Myosin-II only in the medial pool, without  
307 affecting Myosin-II recruitment in the junctional pool (Fig. 4C-C"). This treatment decreased  
308 the Vinc/E-cad ratio without affecting its planar polarized distribution (Fig. 4D, D'). This  
309 reduction in the Vinc/E-cad ratio could be due to a reduction of the load generated by the  
310 medial Myosin-II or a global reduction in junctional tension itself. We ruled out the latter  
311 possibility by laser ablation experiments (Supplementary Fig. 4B) and the fact that junctional  
312 Myosin-II intensity is unchanged in RhoGEF2-RNAi embryos (Fig. 4C"). To complement this  
313 observation, we increased the recruitment of Myosin-II in the medial pool using Gα12/13  
314 over-expression, without affecting Myosin-II recruitment in the junctional pool (Fig. 4E-E").  
315 Consistently, this treatment increased the Vinc/E-cad ratio without affecting its planar  
316 polarized distribution (Fig. 4F, F').

317  
318 Thus, a global decrease (increase) in the levels of medial Myosin-II decreases (increases) the  
319 load on adhesion complexes on all junctions of a cell, as indicated by the decrease (increase)  
320 of Vinc/E-cad ratio. In contrast to a global inhibition of Myosin-II activity, a specific inhibition  
321 of medial Myosin-II activity did not affect the planar polarized distribution of the junctional  
322 Myosin-II and preserved the planar polarized distribution of Vinc/E-cad ratio (Fig. 4B', D').

323 Thus, we conclude that the planar polarized junctional Myosin-II imposes a larger amount of  
324 load on vertical junctions than transverse junctions and determines the planar polarity of  
325 Vinc/E-cad ratio.

326

### 327 **Medial and junctional Myosin-II have opposite effects on junctional E-cadherin** 328 **concentration**

329 Given that medial and junctional pools of Myosin-II load adhesion complexes differently, we  
330 asked whether these two pools had distinct impacts on E-cadherin levels at cell junctions. We  
331 found that a global inhibition of Myosin-II activity (Rok inhibition) decreased the E-cadherin  
332 density at junctions (Fig. 1F, F'). Interestingly, a specific inhibition of the medial Myosin-II  
333 using RhoGEF2-RNAi without perturbation of the junctional Myosin-II (Fig. 4C-C'') also lead  
334 to a reduction in E-cadherin levels (Fig. 5A, A') that was comparable to the Rok inhibited  
335 embryos. This indicated that the global levels of E-cadherin are regulated by medial Myosin-II  
336 and the presence of junctional Myosin-II alone did not restore the global levels of E-cadherin.  
337 To further test this, we used Gα12/13 over-expression to increase the levels of medial  
338 Myosin-II while preserving the levels of junctional Myosin-II (Fig. 4E-E''). We observed an  
339 increase in E-cadherin density at junctions (Fig. 5B-B'). These results suggest that the  
340 contractile medial Myosin-II regulates the global junctional recruitment of E-cadherin.

341

342 Planar polarized junctional Myosin-II (Supplementary Fig. 1H') is important for junction  
343 shrinkage<sup>34,44</sup>. It is hypothesized that the shear stress generated by junctional Myosin-II may  
344 affect the stability of adherens junctions by stretching the trans-cellular E-cadherin dimers<sup>47</sup>.  
345 However, this hypothesis has never been tested with experimental data due to the difficulty  
346 of measuring shear stress. Mechanical inference provides a unique way to approximate  
347 junctional shear stress from inferred tensions of neighboring junctions, which in turn  
348 depends on junctional Myosin-II distribution (Fig. 6A, also see Methods)<sup>47</sup>. Hence, we tested  
349 this hypothesis by estimating the 'conditional correlation' of E-cadherin density with inferred  
350 shear stress on junctions. The shear stress displayed a negative correlation with E-cadherin  
351 density on vertical junctions (Fig. 6C, D). In contrast, this correlation reduced when we  
352 pooled all junctions with different orientations (Fig. 6B) and vanished for transverse junctions  
353 and in Rok inhibited embryos (Fig. 6E, F). It was interesting to note that the transverse  
354 junctions showed the same extent of this correlation, irrespective of Myosin-II activity. This  
355 further emphasized that the shear forces were specifically active on vertical junctions. In  
356 addition, the correlation with inferred tension was much weaker (Fig. 6B, C, D). Combined  
357 together, these results indicated that shear stress, rather than tension, shows negative  
358 correlation with junctional E-cadherin line densities.

359

360 Based on above correlation, we hypothesized that an increase in shear stress would cause a  
361 reduction in E-cadherin levels. To test this hypothesis, we used laser ablations to increase  
362 junctional shear stress by ablating neighboring junction and checked its effect on the E-  
363 cadherin density on the central junction. As shown in the schematic Fig. 6G, the shear on the  
364 central junction can be increased, if  $(T_1+T_3)>(T_2+T_4)$  and when we ablate neighboring junction  
365 4 (or alternatively junction 2), as the ablation releases the tension on the neighboring  
366 junction and enhances the asymmetry of neighboring tensions. We performed mechanical  
367 inference on pre-ablation time point for several instances of laser ablations and identified  
368 post hoc the ablation events (n=47) where we had ablated either the junction 2 or 4. Then,  
369 we estimated the changes in E-cadherin density for the central junction, over 20sec post-



370 ablation. Strikingly, we found that the E-cadherin density reduced for junctions that  
371 experienced an increase in shear stress (Fig. 6H). Further, the shear induced reduction in E-  
372 cadherin density was in contrast to a global increase in E-cadherin density in all junctions  
373 over the same time interval. Also, the reduction in E-cadherin density could not be attributed  
374 to a dilution effect, as the junctions of interest actually shrank (Fig. 6H inset). Thus, an  
375 increase in shear reduced E-cadherin density. Combined together, these results argue that  
376 shear stress enhances the dissociation of E-cadherin on shrinking junctions by shearing the  
377 adhesion complexes during junction remodeling.

378  
379 Together these experiments suggest that the medial Myosin-II increases the levels of  
380 junctional E-cadherin by loading the adhesion complexes on all cell junctions, while planar  
381 polarized junctional Myosin-II decreases E-cadherin levels by exerting shear forces on the  
382 adhesion complexes at vertically shrinking junctions and regulates junction remodeling.

383

## 384 Discussion

385 How contractile forces generated by Myosin-II activity regulate junction remodeling during  
386 morphogenesis is still an open question. In this study, we have used Vinculin as a molecular  
387 force sensor on E-cadherin complexes, whose recruitment to adhesion complexes is  
388 modulated by the contractile activity of Myosin-II and the resulting tensile forces; hence its  
389 ratio with E-cadherin provides a potential readout of mechanical forces on E-cadherin  
390 adhesion complexes at cell junctions. Using mechanical inference and laser ablation, we  
391 found that the enrichment of Vinculin relative to E-cadherin can be used to estimate the  
392 distribution of load on E-cadherin at cell junctions. With our experiments we compared 4  
393 quantities, namely Myosin-II intensity, Vinc/E-cad ratio, inferred tension (in mechanical  
394 inference analysis) and recoil velocities (in laser ablation experiments). Our analysis shows  
395 that these quantities have striking similarities, in terms of what they report. At the same  
396 time, each one of them have their own unique features that might carry distinct significance  
397 based on what aspect of force generation/transmission/sensing/transduction might be of  
398 interest. Only the distribution of Myosin-II can inform about where the tension is generated;  
399 only Vinc/E-cad can tell how E-cadherin complexes experience tension; inferred tension  
400 however is agnostic about the source of tension and reports a cumulative effect of cellular  
401 and tissue scale tension; recoil velocities directly report on the physics of the local  
402 environment of the ablated junction and can be compared across embryos. Given caveats for  
403 each of these methods, the combination of two or more quantities is necessary to get a  
404 complete picture of tension distribution as shown here.

405

406 While we have established Vinc/E-cad ratio as a ratiometric readout for tension, it remains to  
407 be determined how this ratio depends on junctional tension explicitly. The conditional  
408 correlation revealed a length-dependent correlation between Vinc/E-cad ratio and inferred  
409 tension, with reduced correlation for short and long junctions (Fig. 2I). This could suggest a  
410 non-linear dependence of Vinc/E-cad ratio on junctional tension with saturated response at  
411 short junctions under large tension and the presence of a tension threshold for activation at  
412 long junctions under small tension. Experiments with quantitatively controlled tension could  
413 determine the response curve of Vinc/E-cad ratio to the magnitude of tension.

414

415 Next, we tuned the loading forces on adhesion complexes by increasing the E-cadherin levels  
416 and revealed that Vinc/E-cad ratio can be a load sensor at the adhesion complex scale. Given

417 that the stoichiometry between Vinculin and E-cadherin (proportional to Vinc/E-cad ratio) is  
418 a dimensionless quantity, we argue that the Vinc/E-cad ratio estimates the load experienced  
419 by individual (diffraction limited) adhesion clusters. It is interesting to note that the  
420 distribution of Vinc/E-cad ratio is not homogeneous along a junction (e.g. Fig. 1G, 3D, 4B, 4D  
421 and 4F) and that Vinc/E-cad ratio is greater at brighter E-cadherin pixels (Fig. 3F). This  
422 indicates that load distribution is inhomogeneous along the junction and that the junctional  
423 subdomains with higher E-cadherin density experience greater load. This observation is  
424 consistent with a recent study<sup>53</sup>, which reported that the mechanosensitive conformational  
425 changes in  $\alpha$ -Catenin can be observed predominantly in larger E-cadherin clusters.  
426

427 We used Vinc/E-cad ratio as a load estimate to study the effect of contractile forces from two  
428 distinct pools of Myosin-II, the medial and the junctional pool. The two pools are distinct in  
429 terms of their upstream regulation and have been studied in the *Drosophila* embryonic  
430 ectoderm<sup>38</sup>. They are mechanically coupled to adhesion complexes to exert forces on cell-  
431 cell contacts. In this study, we showed that these two pools of Myosin-II have distinct impact  
432 on the distribution of load on E-cadherin. Medial Myosin-II is known to produce isotropic  
433 contractions and we found that it loads adhesion complexes across all junctions within a cell.  
434 In contrast, the planar polarized junctional Myosin-II biases the load towards vertical  
435 junctions, thus regulating the planar polarity of load. We have quantitatively demonstrated  
436 that both pools of Myosin-II exert forces on E-cadherin complexes and cell contacts.  
437

438 The load generated due to activity of medial Myosin-II increases the levels of junctional E-  
439 cadherin. This observation is consistent with a study in the *Drosophila* mesoderm<sup>32</sup>, where it  
440 is observed that the activity of medial Myosin-II protects E-cadherin from a Snail mediated  
441 downregulation. A change in junctional Rho signaling can also change E-cadherin levels  
442 through its impact on the F-actin organization and Myosin-II activity<sup>54-56</sup>. We think that this  
443 is not the case as the junctional Myosin-II levels and presumably junctional Rho signaling is  
444 unchanged when we specifically tuned medial Myosin-II. In fact, the changes in junctional E-  
445 cadherin levels correlated with the changes in medial Rho signaling downstream of activation  
446 by the G $\alpha$ 12/13-RhoGEF2 signaling module. Given that the inhibition of medial Rho signaling  
447 (RhoGEF2-RNAi) and Rok inhibition have similar impact on E-cadherin levels, we argue that  
448 the effect of medial Rho signaling on E-cadherin levels is through its effect on Myosin-II  
449 activation. It remains to be determined if the effect of medial Myosin-II activity on the levels  
450 of junctional E-cadherin is a mechanosensitive response or not.  
451

452 We used mechanical inference to study the effect of junctional Myosin-II on junctional E-  
453 cadherin levels. We constructed a model to estimate shear stress based on inferred tensions.  
454 In this model, an asymmetric distribution of inferred tension on opposite sides of the  
455 junction generates shear stress that stretches E-cadherin trans-dimers on shrinking junctions  
456<sup>47</sup>. Strikingly, we observed a negative correlation between the inferred shear stress and the  
457 junctional E-cadherin levels. Particularly, the negative correlation was specific to vertical  
458 junctions (the category to which shrinking junctions belong) and vanished on either the  
459 transverse junctions or the junctions from Rok inhibited embryos. Further, an increase in  
460 shear stress in laser ablation experiments demonstrated a causal relationship with  
461 reductions in E-cadherin density (Fig. 6G, H). These observations argue that junctional  
462 Myosin-II enhances dissociation of E-cadherin on shrinking junctions during junction  
463 remodeling via a shear effect on E-cadherin complexes. However, we cannot rule out the

464 possibility that medial Myosin-II also contributes to the inferred shear stress to some extent,  
465 as the mechanical inference does not specify the source of the forces.

466

467 We hereby propose a mechanical model for cell junction remodeling, where we highlight the  
468 importance of the subcellular origin of contractile forces and their mechanical effect, namely  
469 tensile versus shear stress, in promoting a change in the levels of E-cadherin at cell contacts  
470 and on junction dynamics. The mechanisms that generate the different responses in E-  
471 cadherin levels remain unknown. We have established Vinculin as a molecular force sensor,  
472 but it remains to be determined whether Vinculin is involved in the stabilization of adherens  
473 junctions by regulating E-cadherin levels as a mechanotransducer. Vinculin is not essential for  
474 survival in *Drosophila*<sup>57</sup>, raising questions about the necessity of its function as a  
475 mechanotransducer. To reveal the mechanism by which actomyosin contractility regulates E-  
476 cadherin levels, it is essential to study the magnitude and orientation of contractile forces,  
477 the spatial distribution of mechanical coupling between the adhesion complexes and the  
478 actomyosin network, and the different modes of energy dissipation at adhesive complexes  
479 under mechanical forces. Given this distinction between tensile and shear stress in the  
480 regulation of E-cadherin at cell contacts, it will also be important to consider the dynamics of  
481 E-cadherin complexes at cell contacts as well as at vertices. Vinculin and E-cadherin are  
482 present at high levels at vertices. A recent study demonstrated that E-cadherin accumulation  
483 at vertices shows oscillatory patterns, which are coordinated with junction shrinkage<sup>58</sup>.  
484 Further, this study also shows that vertices exhibit “sliding behavior” during junction  
485 shrinkage that is consistent with our report that shear stress remodels adhesive complexes  
486 across cell membranes at junctions and, potentially, vertices as well.

487

488 We speculate that adhesion mediated by E-cadherin has evolved to stabilize complexes  
489 under tensile stress and to constantly remodel them under shear stress. Tensile (i.e. normal)  
490 stresses reinforce cell-cell coupling to induce tissue deformation such as tissue invagination.  
491 The shear mode also maintains adhesion but dynamically, thereby allowing tissue  
492 remodeling such as during cell intercalation in the ectoderm: on average the density of  
493 complexes could remain constant but the turnover of homophilic bonds would be increased.  
494 The differential effect of tensile and shear stress on E-cadherin dynamics has the potential of  
495 reconciling conflicting evidence on the role of contractile forces on adhesion and to open a  
496 study of energy dissipation at E-cadherin adhesion complexes in the study of cell-cell  
497 adhesion<sup>4</sup>.

498

## 499 **Methods**

### 500 **Fly lines and genetics**

501 Vinculin-GFP and Vinculin-mCherry are fluorescently tagged transgenes of Vinculin. Vinculin  
502 gene was tagged at its N-terminus with either superfolder GFP or mCherry, using a  
503 pFlyFos025866 Fosmid which encompasses the 8kb of Vinculin gene along with 23.4kb  
504 upstream and 6.8kb downstream regions modified by Recombineering<sup>59</sup>. Tagged Fosmids  
505 were inserted in the genome at attp2 or attp40 landing sites, respectively using PhiC31  
506 mediated site specific insertion transgenesis (Transgenesis performed by BestGene, Inc.).  
507 Vinculin-GFP is used alone to describe Vinculin distribution in the ectodermal cells  
508 (Supplementary Fig. 1E, I). Vinculin-mCherry is always used in combination with either MyoII-  
509 GFP to quantify the localization of Vinculin (Fig. 1 E) or with E-cadherin-GFP either to  
510 quantify localization of Vinculin (Fig.1 A, B, C) and/or to estimate Vinc/E-cad ratio (Fig. 1G,  
511 Fig. 4B).

512 E-cadherin-GFP is a homozygous viable DE-cadherin knock-in at the locus<sup>60</sup>. It is either used  
513 alone to exemplify E-cadherin distribution in the ectodermal cells (Supplementary Fig. 1C, F)  
514 or in combination with either MyoII-mCherry or Vinculin-mCherry. The combination with  
515 MyoII-mCherry is used to quantify the localization of E-cadherin (Fig. 1F) along with Myosin-  
516 II. The combination with Vinculin-mCherry is used to quantify localization of Vinculin and/or  
517 to estimate Vinc/E-cad ratio.

518 MyoII-mCherry and MyoII-GFP are tagged constructs of *Drosophila* 'Myosin-II regulatory light  
519 chain' encoded by gene *spaghetti squash* (*sqh* for short) downstream of its native  
520 ubiquitously active promoter. Some articles also refer to them as *sqh-mCherry* or *sqh-GFP*.  
521 MyoII-mCherry is always used in combination with E-cadherin-GFP and is used to quantify  
522 the localization of Myosin-II (Fig. 4A). MyoII-GFP is either used alone to exemplify its  
523 distribution in ectodermal cells (Supplementary Fig. 1D, H) or in combination with Vinculin-  
524 mCherry to quantify Myosin-II localization (Fig. 1 D). Gifts from Adam Martin (both on  
525 chromosome 2).

526  $\alpha$ -Catenin-YFP is a 'Cambridge Protein Trap Insertion' line (CPTI-002516). DGRC #115551. This  
527 is used to describe  $\alpha$ -Catenin distribution in the ectodermal cells (Supplementary Fig. 1G).

528 67-Gal4 (mat  $\alpha$ Tub-GAL4-VP16) is a ubiquitous, maternally supplied, Gal4 driver. This is used  
529 in combination either with MyoII-mCherry and E-cadherin-GFP OR with Vinculin-mCherry  
530 and E-cadherin-GFP OR with MyoII-GFP in knockdown/over-expression experiments (see  
531 below).

532 UAS-ECad::GFP produces GFP-tagged version of wild-type E-cadherin under UAS promoter.  
533 For E-cadherin over-expression, virgin females with the genotype '+; 67-Gal4, *MyoII-mCherry*,  
534 *E-cadherin-GFP*; +' (Fig. 3 B, B', E-E''), Supplementary Fig. 4A) or '+; 67-Gal4, *Vinculin-mCherry*,  
535 *E-cadherin-GFP*; +' (Fig. 3 C-D', F) were crossed to males with genotype '+; UAS-ECad::GFP; +' (or to control males with genotype '*y, w*; +; +'). Previously used in<sup>41</sup>.

537 RhoGEF2-RNAi was achieved using RhoGEF2 TRiP line (Bloomington #34643). It produces a  
538 short-hairpin RNA downstream of a UAS promoter (*UAS-RhoGEF2-shRNA*) that targets  
539 RhoGEF2 mRNA to perform RNAi mediated knock-down. To achieve an effective RNAi during  
540 early embryonic development, virgin females with the genotype '+; 67-Gal4, *MyoII-mCherry*,  
541 *E-cadherin-GFP*; +' (Fig. 4C-C'', Fig. 5A, A') or '+; 67-Gal4, *Vinculin-mCherry*, *E-cadherin-GFP*; +' (Fig. 4D, D') or '+; 67-Gal4, *MyoII-GFP*; +' (Supplementary Fig. 4B) were first crossed to males  
543 with genotype '+; +; UAS-RhoGEF2-shRNA' (or to control males with genotype '*y, w*; +; +'). F1  
544 virgins from these crosses were further out-crossed to males with genotype '*y, w*; +; +'.

545 UAS-Gα12/13 produces un-tagged version of wild-type Gα12/13, which is the α-subunit of  
546 the heterotrimeric G-protein complex. For Gα12/13 overexpression, virgin females with the  
547 genotype '+; 67-Gal4, MyoII-mCherry, E-cadherin-GFP; +' (Fig. 4E-E'', Fig. 5B, B') or '+; 67-  
548 Gal4, Vinculin-mCherry, E-cadherin-GFP; +' (Fig. 4F, F') were crossed to males with genotype  
549 '+; UAS-Gα12/13; +' (or to control males with genotype 'y, w; +; +'). Gift from Naoyuki Fuse.

550

### 551 **Embryo preparation, RNAi and drug injections**

552 Embryos were prepared as described before<sup>34,61,62</sup>. Briefly, embryos were dechorionated  
553 using bleach, for about 40 seconds and then washed thoroughly with distilled water. The  
554 embryos were then aligned on a flat piece of agar and then glued to a glass coverslip. These  
555 embryos can be submerged in water and can be imaged directly. Alternatively, glued  
556 embryos were kept in an airtight box containing Drierite for about 7 minutes, then covered in  
557 halocarbon oil and then injected with RNase free water containing either dsRNA or drugs.

558

559 α-Catenin RNAi (Fig. 1C-C'') was achieved by injecting dsRNA in embryos, as previously  
560 described<sup>9</sup>. dsRNA probes against α-Catenin were made using PCR products containing the  
561 sequence of the T7 promoter targeting nucleotides 101–828 of α-Catenin sequence  
562 (GenBank accession D13964). dsRNA prepared as already described were diluted for  
563 injection at 5μM concentration and injected within the first hour of embryonic development  
564 to achieve maximum knockdown. As a control, separate set of embryos of the same stage  
565 were injected with similar volume of RNase free water.

566

567 Rok inhibition (Fig. 1D-G'', Fig. 2J-L, Fig. 4A-B'', Fig. 6E, F, Supplementary Fig. 2B, C) was  
568 achieved through drug injections. H1152 is a membrane permeable pharmacological  
569 inhibitor that has high specificity for Rok and blocks its kinase activity. This drug was  
570 dissolved in RNase free water @20mM and injected at the end of cellularization. As a  
571 control, separate set of embryos of the same stage were injected with similar volume of  
572 RNase free water. The reduction in Myosin-II recruitment acts as a direct readout of Rok  
573 inhibition. The effect of Rok inhibition on Vinc/E-cad ratio could not be assessed directly, as  
574 Myosin-II couldn't be imaged simultaneously. Thus, first the inhibition was performed in  
575 embryos expressing MyoII-GFP and Vinculin-mCherry. The reduction in Vinculin intensity can  
576 then be used to assess the extent of Rok inhibition in embryos expressing Vinculin-mCherry  
577 and E-cadherin-GFP, while also estimating the Vinc/E-cad ratio. The reduction in E-cadherin  
578 was cross-checked with another set of embryos expressing E-cadherin-GFP and MyoII-  
579 mCherry, where reduction in MyoII-mCherry recruitment acted as a direct readout of Rok  
580 inhibition.

581

### 582 **Imaging**

583 Time-lapse images were acquired to encompass stage 7 to 8 of the embryonic development  
584<sup>63</sup>, which needs ~15min at room temperature (~22°C). Embryos were imaged for 20–30min  
585 depending on the experiment, on a Nikon spinning-disk Eclipse Ti inverted microscope using  
586 a 100x 1.45 NA oil immersion objective. MyoII-mCherry and E-cadherin-GFP signals were  
587 captured every 30s or higher, on 11 Z-planes, separated by 0.5μm. Vinculin-mCherry and E-  
588 cadherin-GFP signals were captured every 30s or higher, on 7 Z-planes, separated by 0.5μm.  
589 A Nikon spinning-disc Eclipse Ti inverted microscope using a ×100, 1.4 NA oil immersion  
590 objective was used for imaging α-Catenin-YFP. Both systems acquire images using the  
591 MetaMorph software. Laser power and exposure settings had to be optimized separately for

592 each experiment, as the fraction of fluorescently tagged vs untagged protein pool changes, in  
593 accordance with changes in the maternal and zygotic genotype (see Methods: Fly lines and  
594 Genetics). In all cases, imaging conditions were optimized to get best signal while minimizing  
595 photo-bleaching, and were kept identical between control and perturbation embryos.  
596

596

### 597 **Laser ablation experiments**

598 Ablations were performed in a 10-minute time window around stage7b (stage7b  $\pm$  5min) on  
599 an inverted microscope (Eclipse TE 2000-E, Nikon) equipped with a spinning-disc (Ultraview  
600 ERS, Perkin Elmer) for fast imaging. Time lapse at a single z-plane was acquired using a 100x  
601 1.4 NA oil immersion objective. Two color images were acquired in sequence on the same  
602 camera, when necessary. Ablations were performed in parallel with image acquisition.  
603 Ablation events were obtained by exposing the junctions, for duration of 2-3ms, to a near-  
604 infrared laser (1,030 nm) focused in a diffraction-limited spot. Laser power at the back  
605 aperture of the objective was  $\sim$ 800mW.  
606

606

### 607 **Image analysis and Statistics**

608 All image processing was done using FIJI freeware. Raw images were processed using a  
609 custom written macro. First, it generated a 'signal image' by using the StackFocuser plug-in to  
610 determine the plane of best focus, followed by a maximum-intensity projection of only 3 z-  
611 planes (1 z-plane in focus determined by StackFocuser + 2 z-planes basal to it). The macro  
612 also generated a 'background image', first, using a maximum-intensity projection of basal-  
613 most 3 planes, followed by applying a 50pixel radius median filter. The macro then  
614 subtracted the 'background image' from 'signal image' to produce 'processed image'.  
615 Supplementary Figure 6 A-B' exemplify the output of this workflow.  
616

616

617 The images were independently segmented using 'Packing analyzer v2.0' (described in <sup>64</sup>),  
618 which was implemented as a plugin in FIJI, to get segmented junctional networks. E-  
619 Cadherin, Vinculin, Myosin-II or  $\alpha$ -Catenin intensities were used, depending on the genotype  
620 of the embryos (and in that order of preference), for image segmentation in order to identify  
621 cell-cell contacts in a semi-automated manner (exemplified in Supplementary Fig. 6C). Using  
622 another custom written FIJI macro, the segmentation was used to demarcate the junctional  
623 ROIs of about 5-pixel width, such that the vertices (tri-cellular junctions) are excluded  
624 (exemplified in Supplementary Fig. 6C'). Line densities were measured to calculate 'mean  
625 junctional intensity'. Junctions were categorized based on their angle relative to AP axis into  
626 6 'angle bins' (0-15, 15-30 . . . 75-90 degrees). An average of the junctional line densities was  
627 calculated within each 'angle bin' to get 6 values of 'Averaged Line Density (ALD)' for every  
628 embryo. A further average of these ALD values acts as a data point per embryo to estimate  
629 'mean junctional intensity'. The ratio between the ALD for '0-15' (AP) and '75-90' (DV)  
630 categories produces the 'Planar Cell polarity (PCP)' value per embryo as either AP/DV or  
631 DV/AP as mentioned in the Y-axis labels for respective bar plots in the manuscript. A further  
632 average of these PCP values produces 'amplitude of polarity'. Alternatively, the planar  
633 polarity of a protein was represented as 'relative intensity', where the ALD values from the  
634 'angle bins' were normalized by the ALD of either '0-15' or '75-90' category, whichever is  
635 smaller. Essentially, 'amplitude of polarity (DV/AP)' reports the bar for '75-90' category from  
636 the 'relative intensity' plots. In case of Vinc/E-cad ratio, similar calculations were performed  
637 after having calculated the ratio between Vinculin and E-cadherin line densities for every  
638 junction. The same segmentation was also used to identify the medial ROIs (exemplified in

639 Supplementary Fig. 6C'') which were at least 2 pixels away from any junctional ROI and tri-  
640 cellular junctions, and were specifically used for medial Myosin-II intensity estimates. An  
641 average of medial area densities (Averaged Area Density (AAD)) was calculated to get one  
642 data point per embryo, to estimate 'mean medial intensity' for Myosin-II across multiple  
643 embryos.

644  
645 In case of ablation experiments, images were first processed using the 'rolling ball'  
646 background subtraction method implemented in FIJI (rolling ball radius 50). Junctional ROIs  
647 were drawn manually (5 pixels wide) on the ablated junction and on 20+ neighboring  
648 junctions. Then, the 'line density' for the ablated junction was divided by the average of the  
649 line densities for the neighboring junctions. This yielded the 'normalized junctional intensity'.  
650 Such normalization is necessary to reduce embryo-to-embryo variability. In case of Vinc/E-  
651 cad ratio, similar calculations were performed after having calculated the ratio between  
652 Vinculin and E-cadherin line densities for all marked junctions. The vertices of the ablated  
653 junction were tracked manually to estimate the recoil velocity in 2 seconds after the ablation.  
654 Spearman correlation gave an estimate of the extent of correlation between 'pre-ablation  
655 normalized junctional intensity' and corresponding 'post-ablation initial recoil velocity'.  
656

657 For 'pixel scale analysis' of Vinc/E-cad ratio, we identified E-cadherin positive pixels by  
658 estimating the Signal-to-Noise Ratio (SNR) at all pixels (Supplementary Fig. 5A, B) and  
659 measured Vinc/E-cad for the pixels with SNR>1. We empirically decided the range of E-  
660 cadherin pixel intensities to span an order of magnitude, such that each intensity range hosts  
661 statistically meaningful number of pixels (Supplementary Fig. 5C).  
662

663 The 'mean values' and 'standard errors on mean' were calculated from 'n' data points. The  
664 same data points were used for testing statistical significance. In planar polarity and  
665 junctional intensity measurements, 'n' is the number of embryos. Error bars indicate s.e.m.  
666 (i.e., s.d./  $\sqrt{n}$ ). The p-values were estimated using student's t-test, wherever applicable. In  
667 laser ablation experiments, 'n' is the number of ablated junctions that are pooled from many  
668 embryos. The p-values were estimated using Mann-Whitney U-test. The sample sizes were  
669 not predetermined using any statistical methods. The experiments were not randomized,  
670 and the investigators were not blinded to allocation during experiments and outcome  
671 assessment.

672  
673 All measurements were performed on 5–25 embryos spread over at least 3 rounds of  
674 embryo collection and preparation.

675

## 676 **Mechanical Inference**

677 Mechanical inference is an image-based force inference technique that takes a segmented  
678 cellular network as the input and estimates relative tensions along cell junctions by assuming  
679 force balance at each vertex<sup>47–49,65,66</sup>. Force balance is a good assumption even for dynamic  
680 tissues when junctional tensions are much larger than unbalanced residual forces at cell  
681 vertices. This is evidenced by the observation that recoil velocity of laser ablated junction is  
682 much larger than the migration velocity of cell vertex during development in *Drosophila*  
683 ectoderm. We implement mechanical inference on segmented images of cell network based  
684 on the E-cadherin channel. We collect 30 images at a time interval of 30 seconds for each  
685 embryo. The E-cadherin channel images are processed using the freeware ilastik for pixel

686 classification. The resulting probability maps of pixels are processed using a customized  
 687 MATLAB script for cell segmentation using a watershed algorithm. The mechanical inference  
 688 is performed on the segmented image by imposing force balance at each vertex of the cell  
 689 where junctional tensions add up to zero. We assume a homogeneous pressure distribution  
 690 across the tissue based on the observation that the junctional curvatures are negligible in the  
 691 ectoderm during the time window of observation, hence pressure does not enter the force  
 692 balance equation.

693  
 694 The relative junctional tensions are obtained by fitting a tension triangulation network  
 695 perpendicular to the corresponding cell network (Supplementary Fig. 3A). This is termed the  
 696 variational mechanical inference as the optimal tension network is obtained by minimizing  
 697 the energy functional  $\Omega$  determined by the inner product of the tension network and the cell  
 698 network:

$$700 \quad \Omega = \frac{1}{2} \sum_{\langle a,b \rangle} [(\vec{Q}_a - \vec{Q}_b) \cdot \vec{r}_{ij}]^2 - \frac{\Lambda}{2} \sum_{\langle a,b \rangle} (\vec{Q}_a - \vec{Q}_b)^2$$

701  
 702 where  $\vec{Q}_a$  and  $\vec{Q}_b$  are nodes of the tension triangulation as shown in Supplementary Figure  
 703 3A and  $\vec{r}_{ij}$  is the cell edge vector connecting vertex  $i$  and  $j$ .  $\Lambda$  is the Lagrangian multiplier that  
 704 constrains the mean magnitude of tension.<sup>48</sup> The tension triangulation network is obtained  
 705 by choosing the set of  $\vec{Q}$  that minimizes  $\Omega$ . The magnitude of junctional tension along cell  
 706 edge  $ij$ , for example, is then calculated as  $T_{ij} = |\vec{Q}_a - \vec{Q}_b|$ .

707  
 708 To guarantee the tension network to be a triangulation network, we kept only cells with  
 709 three-fold vertices, which make up most of the cells in the population. Since mechanical  
 710 inference yields relative tensions within an image, we normalized the average inferred  
 711 tension to be one.

### 712 713 **Shear stress**

714 Shear stress on the E-cadherin clusters was obtained from a microscopic model of the  
 715 junction (Fig. 6A) as previously described<sup>47</sup>. As illustrated in Figure 6A, tension of the central  
 716 junction is decomposed into cortical tensions at a-cell side and b-cell side of the junction:  
 717  $T = \theta_a(x) + \theta_b(x)$ , where  $x$  is the coordinate along the junction. While  $T$  is constant along  
 718 the junction, cortical tensions  $\theta_a(x)$  and  $\theta_b(x)$  can vary along the junction in opposing  
 719 gradients (red lines in Fig. 6A) as a result of the transfer of tension from one side of the  
 720 junction to the other. This transfer of tension generates shear stress on E-Cadherin dimers.  
 721 Therefore, shear stress at any given point along the junction is defined as the gradient of  
 722 cortical tension  $\tau(x) = \partial_x \theta_a(x) = -\partial_x \theta_b(x)$ . The average shear stress along the junction is  
 723  $\tau = \frac{1}{l} \int_0^l \tau(x) dx = \frac{\theta_a(l) - \theta_a(0)}{l} = \frac{\theta_b(0) - \theta_b(l)}{l}$ . To relate shear stress to junctional tensions as  
 724 obtained from mechanical inference, we assume that cortical tensions are single-valued, i.e.  
 725 continuous, at vertices, from which we get the relation:

$$726 \quad T = \theta_a(0) + \theta_b(0) \quad T_1 = \theta_b(0) + \theta_d(0) \quad T_2 = \theta_a(0) + \theta_d(0)$$

$$728 \quad T = \theta_a(l) + \theta_b(l) \quad T_3 = \theta_a(l) + \theta_c(l) \quad T_4 = \theta_b(l) + \theta_c(l)$$

730



731 We solve equations above to get cortical tensions in terms of junctional tensions and  
732 substitute to the equation for shear stress to obtain the final expression of shear stress:  
733

$$734 \quad \tau = \frac{1}{2l} |(T_1 + T_3) - (T_2 + T_4)|$$

735  
736 where  $l$  is the length of the junction.  
737

### 738 **Local correlation and conditional correlation**

739 The correlations were performed by binning the junctions according to cell, termed local  
740 correlation (Supplementary Fig. 2A), or according to junctional length, termed conditional  
741 correlation (Supplementary Fig. 2A). These two types of correlation are special cases of  
742 partial correlation, defined as the correlation between two random variables  $X$  and  $Y$  while  
743 holding the third variable  $Z$  constant, whose correlation coefficient is given by  $\rho_{XY|Z} =$   
744  $\frac{1}{\sigma_{X|Z}\sigma_{Y|Z}} E[(X|Z - \mu_{X|Z})(Y|Z - \mu_{Y|Z})]$ , where  $\sigma_{X|Z}$  ( $\sigma_{Y|Z}$ ) is the standard deviation of  $X$  ( $Y$ ) at  
745 fixed  $Z$ , and  $\mu_{X|Z}$  ( $\mu_{Y|Z}$ ) is the average value of  $X$  ( $Y$ ) at fixed  $Z$ . The partial correlation removes  
746 the spurious correlation between  $X$  and  $Y$  due to the confounding variable  $Z$  which is related  
747 to both  $X$  and  $Y$ .

748  
749 The local correlation avoided the temporal and spatial variations of tension and fluorescence  
750 intensity, and yielded the correlation coefficient for each cell. We implemented the local  
751 correlation by computing the Pearson correlation coefficient between inferred tension and  
752 either the Vinc/E-cad ratio, Myosin intensity or Vinculin intensity among junctions within  
753 each cell. The resulting correlation coefficients were combined across all cells and multiple  
754 embryos to yield a distribution as shown in Figure 2J-L.

755  
756 The conditional correlation avoided the spurious intensity-intensity and intensity-tension  
757 correlation resulting from the variation of junctional length, because both the intensities and  
758 the inferred tension are proportional to the inverse of junctional length (Supplementary Fig.  
759 2D). It also yielded the correlation coefficient as a function of junctional length (Fig. 2I, Fig.  
760 6D and F, Supplementary Fig. 2C). We implemented the conditional correlation by sorting 10  
761 junctions of the same length into the same bin. A linear correlation coefficient was computed  
762 among these 10 junctions with the same length for Vinculin and E-cadherin intensity  
763 (Supplementary Fig. 2C), E-cadherin intensity and inferred shear (Fig. 6D and F), junctional  
764 intensity and inferred tension (Fig. 2I). The binning was performed independently for each  
765 snapshot to avoid temporal and inter-embryo variations. Finally, we obtained the distribution  
766 of the conditional correlation coefficient by combining all the bins across time points and  
767 embryos (Fig. 2H, Fig. 6C and E, Supplementary Fig. 2B).

### 768 769 **Figure legends**

#### 770 771 **Figure 1: Regulation of Vinculin localization**

772 (A-C'') Vinculin is recruited to E-cadherin based adhesion complexes and this recruitment  
773 requires  $\alpha$ -Catenin. (A) Colocalization between E-cadherin and Vinculin. Various E-cadherin  
774 clusters (arrowheads) colocalize with those of Vinculin. (B) Top panels, zoom-in view of boxed  
775 junction in 'A'. Bottom panel shows the similarities in the intensity profiles for Vinculin and E-

776 cadherin. (C) Representative images showing the distribution of Vinculin in water-injected  
777 embryo (left) and  $\alpha$ -Catenin dsRNA injected embryo (right). (C', C'') Quantifications showing  
778 a reduction in Vinculin recruitment and a loss of the planar polarized distribution of Vinculin  
779 due to  $\alpha$ -Catenin RNAi. Number of embryos in inset.  
780 (D-G'') Vinculin enrichment relative to E-cadherin is tuned by Myosin-II activity. Rok inhibitor  
781 H1152 was injected @ 20mM concentration to inhibit Myosin-II activity. (D, E, F and G)  
782 Representative images showing the distribution of Myosin-II, Vinculin, E-cadherin and Vinc/E-  
783 cad ratio, respectively, in water-injected control embryos (left panels) and H1152-injected  
784 embryos (right panels). (D', D'') Quantifications showing a reduction in junctional Myosin-II  
785 recruitment and a loss of its planar polarized distribution due to Rok inhibition. Number of  
786 embryos in inset. (E', E'') Quantifications showing a reduction in Vinculin recruitment and an  
787 inversion of its planar polarized distribution due to Rok inhibition. Number of embryos in  
788 inset. (F', F'') Quantifications showing the reduction in E-cadherin levels and an amplification  
789 of its planar polarized distribution due to Rok inhibition. Number of embryos in inset.  
790 Corresponding representative images and quantifications for changes in Myosin-II  
791 distribution are presented in Figure 4A-A''. (G', G'') Quantifications showing a reduction in  
792 Vinc/E-cad ratio and a loss of its planar polarized distribution due to Rok inhibition. Number  
793 of embryos in inset.

794

795 All scale bars represent 5 $\mu$ m. Statistical significance estimated using 'Student's t-test'.  
796 Images/quantifications in A-C'' and G-G'' come from embryos co-expressing Vinculin-  
797 mCherry and E-cadherin-GFP. Junctions marked based on E-cadherin localization.  
798 Images/quantifications in D-E'' come from embryos co-expressing Vinculin-mCherry and  
799 MyoII-GFP. Junctions marked based on Vinculin localization. Images/quantifications in F-F''  
800 come from embryos co-expressing MyoII-mCherry and E-cadherin-GFP. Junctions marked  
801 based on E-cadherin localization.

802 ns, p>0.05; \*, p<0.05; \*\*, p<0.01; \*\*\*, p<0.001; \*\*\*\*, p<0.0001

803

## 804 **Figure 2: Vinc/E-cad ratio correlates with the junctional tension**

805 (A-D) Mechanical inference captures the planar polarized tension distribution in the  
806 embryonic ectoderm. (A) Snapshot from an embryo where junctions can be identified with E-  
807 cadherin-GFP signal. (B) The "skeleton" image showing the approximated network of cell  
808 contacts that is used as an input to perform mechanical inference analysis. See methods for  
809 further details about how to go from A to B. (C) A representative output of mechanical  
810 inference where thicker lines indicate junctions under greater tension. (D) The distribution of  
811 inferred tension shows a trend similar to the planar polarity of junctional Myosin-II and  
812 Vinc/E-cad ratio. Number of embryos in inset.

813 (E-G) Vinc/E-cad ratio correlates with junctional tension estimated using mechanical  
814 inference and laser ablations. A scatter plot showing (E) the distribution of the pre-ablation  
815 Vinc/E-cad ratio against the post-ablation recoil velocities for multiple events of junctional  
816 ablations and (F) the distribution of pre-ablation Vinc/E-cad ratio against the pre-ablation  
817 inferred tension, for a subset of junctions in E on which mechanical inference could be  
818 performed. (G) Another scatter plot showing the distribution of Vinc/E-cad ratio against  
819 inferred tension for junctions from a single image. For E and F in insets, Spearman correlation  
820 coefficient 'p' with corresponding 'p-value', and number of ablations events 'n' pooled from  
821 'N' embryos. For G in inset, Spearman correlation coefficient 'p' with corresponding 'p-value'  
822 and number of junctions 'n' from the snapshot.

823 (H, I) Vinc/E-cad ratio and Myosin-II have similar extent of conditional correlation with  
824 inferred tension. Box plots (H) showing the distribution of conditional correlation coefficients  
825 for Vinc/E-cad ratio, Vinculin and junctional Myosin-II intensity against inferred tension  
826 conditioned on the length of the junction. The same data is plotted as function of Length of  
827 junction (I). See methods for more details. The statistics are based on 37350 junctions across  
828 6 embryos with 10 junctions in one conditional bin.

829 (J-L) Vinc/E-cad ratio and Myosin-II have similar extent of local correlation with inferred  
830 tension. Box plots showing the distribution of local correlation coefficients between the  
831 inferred tension and either the Junctional Myosin-II (J, n=3500 cells), the Vinc/E-cad ratio (K,  
832 n=9000 cells) or the Vinculin intensity (L, n=9000 cells), for WT embryos, H1152 injected  
833 embryos along with statistical null.

834  
835 Images/Quantifications in A-G come from embryos co-expressing Vinculin-mCherry and E-  
836 cadherin-GFP. For H-L, Vinculin density and Vinc/E-cad ratio related quantifications come  
837 from embryos co-expressing Vinculin-mCherry and E-cadherin-GFP, while those for junctional  
838 Myosin-II come from embryos co-expression MyoII-mCherry and E-cadherin-GFP. The boxes  
839 in H and J-L represent 25<sup>th</sup> percentiles to 75<sup>th</sup> percentiles; the whiskers represent 5<sup>th</sup>  
840 percentiles to 95<sup>th</sup> percentiles; and the red lines represent the medians. The error bars in 'I'  
841 represent the standard error across 100 different bins with the same length of junction.

842

843 **Figure 3: Vinc/E-cad ratio represents the load on adhesion complexes.**

844 Mild over-expression of E-cadherin reduces Vinc/E-cad ratio levels without changes in either  
845 the distribution of Myosin-II or the tension on junctions.

846 (A) Schematics showing the effect of E-cadherin over-expression on Vinculin recruitment. In  
847 the WT scenario, Vinculin recruitment is driven by the amount of tension generated by  
848 actomyosin contractility loaded on each adhesion complex. After E-cadherin overexpression,  
849 the same tension is supported by more adhesion complexes, leading to less Vinculin  
850 recruitment, which would result in an overall decrease of Vinc/E-cad ratio.

851 (B, C, D, E) Representative images showing the distribution of E-cadherin, Vinculin, Vinc/E-  
852 cad ratio and Myosin-II, respectively, in genetic outcross control embryos (left panels) and E-  
853 cadherin over-expressing embryos (right panels). (B') Quantifications showing an increase in  
854 E-cadherin levels at the junctions, quantified as increase in mean junctional intensity. (C')  
855 Quantifications showing a decrease in Vinculin levels at the junctions, quantified as a  
856 decrease in mean junctional intensity. (D') Quantifications showing a reduction in mean  
857 junctional Vinc/E-cad ratio. (E' and E'') Quantifications showing that the distribution of  
858 Myosin-II hasn't changed upon E-cadherin over-expression.

859 Vinc/E-cad ratio reduces due to E-cadherin over-expression, even at adhesion cluster scale

860 (F) Quantifications showing Vinc/E-cad ratio estimated at the scale of individual pixels and  
861 plotted against corresponding E-cadherin pixel bin intensity. Each bin is 25 intensity units  
862 wide. The Vinc/E-cad ratio represents the average of Vinc/E-cad ratio for all pixels in that bin,  
863 separately estimated for individual embryos. Mean and SEM are calculated across embryos.

864

865 All scale bars represent 5 $\mu$ m. Statistical significances were estimated using 'Student's t-test'.

866 For the data in B', C', D', E', E'' and F n=7 embryos for both, control and UAS-E-cad::GFP.

867 Images/quantifications in B, B' and E-E'' come from embryo co-expressing MyoII-mCherry

868 and E-cadherin-GFP. Images/quantifications in C-D' and F come from embryo co-expressing

869 Vinculin-mCherry and E-cadherin-GFP. In all cases, Junctions/pixels marked based on E-  
870 cadherin localization.

871 ns,  $p > 0.05$ ; \*,  $p < 0.05$ ; \*\*,  $p < 0.01$ ; \*\*\*,  $p < 0.001$

872

873 **Figure 4: Medial Myosin tunes the levels of Vinc/E-cad ratio, while junctional Myosin tunes**  
874 **its planar polarized distribution**

875 Inhibition of Myosin-II activity reduces the levels of Vinc/E-cad ratio and abolishes its planar

876 polarity. (A, B) Representative images showing the distribution of Myosin-II and Vinc/E-cad

877 ratio, respectively, in the water injection 'control' embryos (left) and H1152 injected 'Rok

878 inhibition' embryos (right). (A' and A'') Quantifications showing the reduction in the levels of

879 Myosin-II in the medial and junction pool, along with a loss of planar polarity, upon Rok

880 inhibition. Data from  $n=7$  embryos for both controls and Rok inhibitions. (B') Quantifications

881 showing a reduction in mean junctional Vinc/E-cad ratio, along with a loss of polarity. Data

882 from  $n=6$  embryos for controls and  $n=7$  for Rok inhibitions.

883 Inhibition of Myosin-II activity in the medial pool using RhoGEF2-RNAi, reduces the levels

884 Vinc/E-cad ratio, without affecting its planar polarized distribution. (C, D) Representative

885 images showing the distribution of Myosin-II and Vinc/E-cad ratio, respectively, in the genetic

886 outcross control embryos (left) and RhoGEF2-RNAi embryos (right). (C' and C'')

887 Quantifications showing the reduction in the levels of medial Myosin-II, without a change in

888 the distribution of junctional Myosin-II. Data from  $n=8$  embryos for both RhoGEF2-RNAi and

889 control. (D') Quantifications showing a reduction in mean junctional Vinc/E-cad ratio, without

890 an effect on its planar polarized distribution. Data from  $n=6$  embryos for control and  $n=7$

891 embryos for RhoGEF2-RNAi.

892 Hyper-activation of Myosin-II in the medial pool using  $G\alpha 12/13$  over-expression, increases

893 the levels Vinc/E-cad ratio, without affecting its planar polarized distribution. (E, F)

894 Representative images showing the distribution of Myosin-II and Vinc/E-cad ratio,

895 respectively, in the genetic outcross control embryos (left) and  $G\alpha 12/13$  over-expressing

896 embryos (right). (E' and E'') Quantifications showing the increase in the levels of medial

897 Myosin-II, without a significant change in the distribution of junctional Myosin-II. Data from

898  $n=7$  embryos for both  $G\alpha 12/13$  over-expression and control. (D') Quantifications showing an

899 increase in the mean junctional Vinc/E-cad ratio, without a significant effect on its planar

900 polarized distribution. Data from  $n=7$  embryos for control and  $n=6$  embryos for  $G\alpha 12/13$

901 over-expression.

902

903 All scale bars represent  $5\mu\text{m}$ . Statistical significance estimated using 'Student's t-test'.

904 Images/quantifications in A-A'', C-C'' and E-E'' come from embryo co-expressing MyoII-

905 mCherry and E-cadherin-GFP, though the proportion of tagged vs un-tagged protein pool

906 varies across different experiments (detailed in 'Methods: Fly lines and genetics'). Images/

907 quantifications in B-B', D-D' and F-F' come from embryo co-expressing Vinculin-mCherry and

908 E-cadherin-GFP, though the proportion of tagged vs un-tagged protein pool varies across

909 different experiments (detailed in 'Methods: Fly lines and genetics'). In all cases, Junctions

910 marked based on E-cadherin localization. Images/quantifications in B-B' are from the same

911 set of embryos as those presented in Figure 1G-G''.

912 ns,  $p > 0.05$ ; \*,  $p < 0.05$ ; \*\*,  $p < 0.01$ ; \*\*\*,  $p < 0.001$ ; \*\*\*\*,  $p < 0.0001$

913

914 **Figure 5: Medial Myosin-II tunes the levels of junctional E-cadherin**

915 A reduction (increase) in medial Myosin-II correlates with a decrease (increase) in the global  
916 junctional levels of E-cadherin.

917 (A) Representative images showing the distribution of E-cadherin, in the genetic outcross  
918 control embryos (left) and RhoGEF2-RNAi embryos (right). (A') Quantifications showing the  
919 reduction in E-cadherin levels, quantified as mean junctional intensity. Data from n=8  
920 embryos for both RhoGEF2-RNAi and control.

921 (B) Representative images showing the distribution of E-cadherin, in the genetic outcross  
922 control embryos (left) and Gα12/13 over-expressing embryos (right). (B') Quantifications  
923 showing an increase in E-cadherin levels, quantified as mean junctional intensity. Data from  
924 n=7 embryos for both Gα12/13 over-expression and control.

925

926 All scale bars represent 5μm. Statistical significance estimated using 'Student's t-test'.  
927 Images/quantifications in all panels come from embryo co-expressing MyoII-mCherry and E-  
928 cadherin-GFP, though the proportion of tagged vs un-tagged protein pool varies across  
929 different experiments (detailed in 'Methods: Fly lines and genetics'). In all cases, Junctions  
930 marked based on E-cadherin localization.

931 ns, p>0.05; \*, p<0.05; \*\*, p<0.01; \*\*\*, p<0.001

932

933 **Figure 6: Increase in shear stress reduces the levels of junctional E-cadherin**

934 (A) Schematic representation of a model of the junction to construct shear and the  
935 corresponding equation of shear stress. Left schematic shows the distribution of junctional  
936 Myosin-II (blue lines, line thickness indicates concentration) and E-cadherin for central  
937 junction (green lines). Right panel shows the model that translates the junctional Myosin-II  
938 distribution into inferred tension (yellow arrow) and its relationship with the asymmetrical  
939 cortical tension on the central junction (red lines/wedges), which is responsible for the shear  
940 stress on E-cadherin (green lines). See 'Methods: mechanical inference and shear stress' for  
941 more details.

942 (B) Correlation of inferred tension and shear with E-cadherin intensity conditioned on the  
943 length of the junction. The statistics are based on 19500 junctions across 5 embryos with 10  
944 junctions in one conditional bin.

945 (C, D) Correlation of inferred tension and shear with E-cadherin intensity conditioned on the  
946 length of the junction, only for the vertical junctions' subset from the data in B.

947 (E, F) Correlation of inferred shear with E-cadherin intensity conditioned on the length of the  
948 junction for vertical and transverse junctions for wild-type and Rok inhibited embryos. The  
949 statistics for wild-type (Rok inhibited) embryos are based on 15000 junctions across 5 (10)  
950 embryos with 10 junctions in one conditional bin for both transverse and vertical junctions.

951 (G) Building on the schematic representation in A, a model for an increase in junctional shear  
952 stress in response to laser ablations. Note that the schematic only exemplifies the ablation in  
953 junction 4, and an ablation in junction 2 will have a similar effect as well. Similar to A, blue  
954 lines denote junctional Myosin-II, green lines denote E-cadherin, yellow arrows denote the  
955 inferred tension on junction, and ablated junction is shown with dashed lines to indicate  
956 disrupted actomyosin cortex and reduced junctional tension.

957 (H) Relative changes in E-cadherin intensity and relative changes in junction length (inset) for  
958 control junctions (No ablation) and junctions where shear increased due to an ablation in the  
959 neighboring junction (Ablation). Relative change = (final value – initial value)/ (initial value).

960 Number of junctions in each bar plot is indicated. A close to 35-fold change in the number of

961 data points in the plots is due to the fact that an image typically has around 40 junctions  
962 while only 1 or 2 junction is assessed for changes in shear.

963  
964 Quantification in all panels come from embryos co-expressing Vinculin-mCherry and E-  
965 cadherin-GFP. The error bars in D and F represent the standard error across 100 different bins  
966 with the same length of junction. The boxes in B, C and E represent 25<sup>th</sup> percentiles to 75<sup>th</sup>  
967 percentiles; the whiskers represent 5<sup>th</sup> percentiles to 95<sup>th</sup> percentiles; and the red lines  
968 represent the medians. Bars plots and error bars in H and H-inset represent mean and SEM  
969 respectively, for indicated number of junctions pooled from 24 instances of ablations from 11  
970 embryos.

971  
972 **Supplementary Figure 1: Cellular sources of tension and the distribution of Vinculin in the**  
973 **embryonic ectoderm**

974 Junctional Myosin-II exerts tensile forces parallel to junctions, while medial Myosin-II exerts  
975 tensile forces perpendicular to junctions: Schematic in A shows the medial and junctional  
976 actomyosin cortices. Contractions in the junctional Myosin-II tries to maintain junctions  
977 under parallel tension, which can be released using junctional ablations (A') to see a tension  
978 relaxation and a consequent recoil of the vertices. Contractions in the medial cortex pull on  
979 the junctions in a perpendicular direction and can produce inward curvature, which can be  
980 released using medial ablation (A'') to see a loss of said curvature.

981 Apico-basal polarity: (B) Schematic representation of apical region of the ectodermal cells.  
982 Various horizontal lines correspond to cross-sections shown in C, D and E. (C-E) Planar view  
983 of E-cadherin, Myosin-II and Vinculin at different z-steps of 1 $\mu$ m from apical surface. E-  
984 cadherin, Myosin-II and Vinculin enrichment in junctional plane is evident.

985 Planar polarity: (F-I) Images showing z-projection over 3 $\mu$ m apical region to represent  
986 junctional localization of E-cadherin,  $\alpha$ -Catenin, Myosin-II and Vinculin, respectively.  
987 Boundary between cytoplasm and cell contacts is emphasized in H, as Myosin-II distribution  
988 doesn't mark all junctions. (F'-I') Quantifications for planar polarity averaged across multiple  
989 embryos (n=5, 7, 6 and 7 embryos for E-cadherin,  $\alpha$ -Catenin, Myosin-II and Vinculin,  
990 respectively). Error bars represent SEM.

991  
992 All scale bars are 5 $\mu$ m. Images/quantifications in C, F and F' come from embryos expressing  
993 E-cadherin-GFP. Images/quantifications in D, H and H' come from embryos expressing MyoII-  
994 GFP. Images/quantifications in E, I and I' come from embryos expressing Vinculin-GFP.  
995 Images/quantifications in G and G' come from embryos expressing  $\alpha$ -Catenin-YFP.

996  
997 **Supplementary Figure 2: Additional correlation analyses**

998 (A) Schematic representation to describe 'conditional correlation' and 'local correlation'.  
999 Various junctions are numbered as shown. Similarly colored junctions belong to the same  
1000 length category and will be binned together for 'conditional correlation' analysis. Junctions of  
1001 the same cell will be binned together for 'local correlation' analysis. Also, see Methods.

1002 (B, C) Conditional correlation of Vinculin intensity with E-cadherin intensity conditioned on  
1003 the length of the junction for wild-type and Rok inhibited embryos. The statistics are based  
1004 on 35180 junctions across 6 embryos with 10 junctions in one conditional bin for both wild-  
1005 type and Rok inhibited embryos.

1006 (D) Box plots showing the distribution of local correlation coefficient between inferred  
1007 tension and the inverse of junction length. The statistics are based on 9000 cells across 6  
1008 embryos.

1009  
1010 The boxes in B and D represent 25<sup>th</sup> percentiles to 75<sup>th</sup> percentiles; the whiskers represent 5<sup>th</sup>  
1011 percentiles to 95<sup>th</sup> percentiles; and the red lines represent the medians. The error bars in C  
1012 represent the standard error across 100 different bins with the same length of junction.  
1013 Vinculin- E-cadherin correlations in B and C were estimated for appropriately injected  
1014 embryos co-expressing Vinculin-mCherry and E-cadherin-GFP.

1015  
1016 **Supplementary Figure 3: Additional ablation and mechanical inference analyses**

1017 (A) Schematic representation for use of tension triangulation to estimate inferred tensions  
1018 from cellular networks. See 'Methods: mechanical inference' for more details.  
1019 (B) Schematic representation of junctional recoil after an event of ablation. Junctions under  
1020 low tension (top panels) show slower initial recoil, whereas junctions under high tension  
1021 (bottom panels) show faster initial recoil. See 'Methods: laser ablations' for more details  
1022 (C-F) Scatter plots showing the distribution of the pre-ablation inferred tension (C), junctional  
1023 Myosin-II intensities (D), Vinculin intensities (E), or E-cadherin intensities (F) plotted against  
1024 the post-ablation recoil velocities for multiple events of junctional ablations. In insets,  
1025 Spearman correlation coefficient 'ρ' with corresponding 'p-value', and number of ablations  
1026 events 'n' pooled from 'N' embryos.

1027  
1028 Quantification in D come from embryos expressing MyoII-GFP. Quantifications in E and F  
1029 come from embryos co-expressing Vinculin-mCherry and E-cadherin-GFP, which is the same  
1030 set of ablation events as those in Figure 2E. Quantifications in C are pooled subsets of two  
1031 ablation data sets on which mechanical inference could be performed; first, same as E and F  
1032 above (n=54, N=18), and second the 'controls' used in Supplementary Figure 4A (n=22,  
1033 N=13).

1034  
1035 **Supplementary Figure 4: Ablation analyses to estimate the distribution of junctional  
1036 tension**

1037 (A) The distribution of recoil velocities didn't change in either the transverse or vertical  
1038 junctions upon E-cadherin over-expression, indicating that the distribution of junctional  
1039 tension hasn't changed either. Number of ablated junctions in each category is indicated next  
1040 to its distribution. Transverse and vertical junctions pooled from various ablation events in 17  
1041 embryos for control and 9 embryos for UAS-E-cad::GFP

1042 (B) The recoils are faster upon RhoGEF2-RNAi, in both the transverse and vertical junctions,  
1043 indicating that the junctional tension hasn't decreased. Number of ablated junctions in each  
1044 category is indicated next to its distribution. Transverse and vertical junctions pooled from  
1045 various ablation events in 14 embryos for control and 9 embryos for RhoGEF2-RNAi.

1046  
1047 Statistical significance estimated using 'Mann-Whitney U-test'. Quantifications in 'A' come  
1048 from embryos co-expressing MyoII-mCherry and E-cadherin-GFP, with or without  
1049 accompanying E-cadherin over-expression. Quantifications in 'B' come from embryos  
1050 expressing MyoII-GFP, with or without accompanying RhoGEF2-RNAi.  
1051 ns, p>0.05

1052

1053 **Supplementary Figure 5: Supporting information for ‘pixel analysis’ of Vinc/E-cad ratio**

1054 (A) Schematic representation of the concept employed to identify pixels positive for E-  
1055 cadherin. Signal-to-Noise Ratio (SNR) provides a completely objective way to determine a  
1056 signal pixel. SNR is estimated using a simple local estimation of the ratio between the mean  
1057 ( $\mu$ ) of pixel intensities and the standard deviation ( $\sigma$ ) of pixel intensities. At the signal pixel,  
1058 the ratio of pixel intensities from Vinculin and E-cadherin image channels gives the Vinc/E-  
1059 cad ratio.

1060 (B) Representative images showing the conversion from E-cadherin channel image to SNR  
1061 image. The E-cadherin-GFP images are at 1, 2 or 3 $\mu$ m distance from the surface of the  
1062 embryo (similar to Supplementary Fig. 1B). The corresponding SNR images show all pixels  
1063 with intensity>1. In such a representation, all cytoplasmic pixels are blank. Scale bar 5 $\mu$ m.

1064 (C) Quantifications showing the number of pixels in various E-cadherin pixel intensity bins.  
1065 Each bin is 25 intensity units wide. The number of pixels is comparable between control and  
1066 E-cadherin over-expressing embryos, across an order of a magnitude of pixel intensities.  
1067 Number of pixels in a bin are separately estimated for individual embryos. Mean and SEM  
1068 are calculated across embryos. Arrow indicates the minimum average number of pixels  
1069 required to have meaningful statistics for individual embryos in both control and E-cadherin  
1070 over-expressing embryos.

1071

1072 **Supplementary Figure 6: Supporting information for image analysis workflow**

1073 Here we are giving an example to show various steps for the image analysis to quantify  
1074 junctional and medial intensities.

1075 ‘Image processing workflow’ sets the background intensities to zero: (A, B) Example images  
1076 showing E-cadherin intensity distribution in a ‘Maximum intensity projection’ (A) of the raw  
1077 data and a ‘processed image’ (B) that is obtained at the end of image processing part of the  
1078 workflow. Note that the contrast between A and B is the same and is shown in LUT bar below  
1079 B. The intensity profiles along the yellow lines are presented in A’ and B’. As it can be clearly  
1080 seen, image processing shifts the baseline intensity values close to zero, without affecting  
1081 the heights of individual peaks. Thus, the contribution from the background to junctional/  
1082 medial intensity measurements is only minor, if any.

1083 ‘Segmentation workflow produces ROIs for cell contacts (junctional pool) and cells (medial  
1084 pool): (C) Example image showing the segmentation output for example image presented in  
1085 A. As described in Methods, cell contacts are first segmented using ‘Packing Analyzer v2.0’  
1086 and then manually corrected to ensure accuracy. Using this segmentation, junctional ROIs  
1087 (C’) and medial ROIs (C’’) are automatically generated using a custom written macros in FIJI,  
1088 which are further corrected manually to ensure accuracy.

1089 (D) Here, we are giving a visual representation of how the junctional intensities are  
1090 processed to get ‘mean junctional intensity’. This is a follow-up of ROIs presented in C’ and  
1091 uses another custom written FIJI macro.

1092 (E) Here, we are giving a visual representation of how the medial intensities are processed to  
1093 get ‘mean medial intensity’. This is a follow-up of ROIs presented in C’’ and uses a separate  
1094 custom written FIJI macro.

1095



1096 **References**

1097

1098 1. Lecuit, T., Lenne, P.-F. & Munro, E. Force generation, transmission, and integration during  
1099 cell and tissue morphogenesis. *Annu. Rev. Cell Dev. Biol.* **27**, 157–84 (2011).

1100 2. Heisenberg, C.-P. & Bellaïche, Y. Forces in Tissue Morphogenesis and Patterning. *Cell* **153**,  
1101 948–962 (2013).

1102 3. Hunter, M. V & Fernandez-Gonzalez, R. Coordinating cell movements in vivo : junctional  
1103 and cytoskeletal dynamics lead the way. *Curr. Opin. Cell Biol.* **48**, 54–62 (2017).

1104 4. Yap, A. S., Duszyc, K. & Viasnoff, V. Mechanosensing and Mechanotransduction at Cell–  
1105 Cell Junctions. *Cold Spring Harb. Perspect. Biol.* a028761 (2017).  
1106 doi:10.1101/cshperspect.a028761

1107 5. Truong Quang, B. A., Mani, M., Markova, O., Lecuit, T. & Lenne, P. F. Principles of E-  
1108 cadherin supramolecular organization in vivo. *Curr. Biol.* **23**, 2197–2207 (2013).

1109 6. Wu, Y., Kanchanawong, P. & Zaidel-Bar, R. Actin-Delimited Adhesion-Independent  
1110 Clustering of E-Cadherin Forms the Nanoscale Building Blocks of Adherens Junctions. *Dev.*  
1111 *Cell* **32**, 139–154 (2015).

1112 7. Yap, A. S., Gomez, G. A. & Parton, R. G. Adherens Junctions Revisualized: Organizing  
1113 Cadherins as Nanoassemblies. *Dev. Cell* **35**, 12–20 (2015).

1114 8. Sako, Y., Nagafuchi, A., Tsukita, S., Takeichi, M. & Kusumi, A. Cytoplasmic regulation of the  
1115 movement of E-cadherin on the free cell surface as studied by optical tweezers and single  
1116 particle tracking: corralling and tethering by the membrane skeleton. *J. Cell Biol.* **140**,  
1117 1227–40 (1998).

1118 9. Cavey, M., Rauzi, M., Lenne, P.-F. & Lecuit, T. A two-tiered mechanism for stabilization and  
1119 immobilization of E-cadherin. *Nature* **453**, 751–6 (2008).

1120 10. Yonemura, S., Wada, Y., Watanabe, T., Nagafuchi, A. & Shibata, M. alpha-Catenin as a  
1121 tension transducer that induces adherens junction development. *Nat. Cell Biol.* **12**, 533–  
1122 42 (2010).

1123 11. Buckley, C. D. *et al.* Cell adhesion. The minimal cadherin-catenin complex binds to actin  
1124 filaments under force. *Science* **346**, 1254211 (2014).

1125 12. le Duc, Q. *et al.* Vinculin potentiates E-cadherin mechanosensing and is recruited to actin-  
1126 anchored sites within adherens junctions in a myosin II-dependent manner. *J. Cell Biol.*  
1127 **189**, 1107–1115 (2010).

1128 13. Engl, W., Arasi, B., Yap, L. L., Thiery, J. P. & Viasnoff, V. Actin dynamics modulate  
1129 mechanosensitive immobilization of E-cadherin at adherens junctions. *Nat. Cell Biol.* **16**,  
1130 587–94 (2014).

1131 14. Adams, C. L., Chen, Y. T., Smith, S. J. & Nelson, W. J. Mechanisms of epithelial cell-cell  
1132 adhesion and cell compaction revealed by high-resolution tracking of E-cadherin-green  
1133 fluorescent protein. *J. Cell Biol.* **142**, 1105–19 (1998).

1134 15. Chu, Y.-S. *et al.* Force measurements in E-cadherin-mediated cell doublets reveal rapid  
1135 adhesion strengthened by actin cytoskeleton remodeling through Rac and Cdc42. *J. Cell*  
1136 *Biol.* **167**, 1183–94 (2004).

1137 16. Maître, J.-L. *et al.* Adhesion Functions in Cell Sorting by Mechanically Coupling the  
1138 Cortices of Adhering Cells. *Science* **338**, 253–6 (2012).

1139 17. Rangarajan, E. S. & Izard, T. The cytoskeletal protein  $\alpha$ -catenin unfurls upon binding to  
1140 vinculin. *J. Biol. Chem.* **287**, 18492–9 (2012).

1141 18. Kim, T. J. *et al.* Dynamic visualization of  $\alpha$ -catenin reveals rapid, reversible conformation  
1142 switching between tension states. *Curr. Biol.* **25**, 218–224 (2015).

- 1143 19. Thomas, W. A. *et al.* alpha-Catenin and vinculin cooperate to promote high E-cadherin-  
1144 based adhesion strength. *J. Biol. Chem.* **288**, 4957–4969 (2013).
- 1145 20. Barry, A. K. *et al.*  $\alpha$ -Catenin cytomechanics: role in cadherin-dependent adhesion and  
1146 mechanotransduction. *J. Cell Sci.* 1779–1791 (2014). doi:10.1242/jcs.139014
- 1147 21. Nelson, W. J. & Weis, W. I. 25 Years of Tension over Actin Binding to the Cadherin Cell  
1148 Adhesion Complex: The Devil is in the Details. *Trends Cell Biol.* **26**, 471–473 (2016).
- 1149 22. Mège, R. M. & Ishiyama, N. Integration of Cadherin Adhesion and Cytoskeleton at  
1150 Adherens Junctions. *Cold Spring Harb. Perspect. Biol.* a028738 (2017).  
1151 doi:10.1101/cshperspect.a028738
- 1152 23. Coopman, P. & Djiane, A. Adherens Junction and E-Cadherin complex regulation by  
1153 epithelial polarity. *Cell. Mol. Life Sci.* **73**, 3535–3553 (2016).
- 1154 24. Ladoux, B., Nelson, W. J., Yan, J. & Mège, R. M. The mechanotransduction machinery at  
1155 work at adherens junctions. *Integr. Biol.* **7**, 1109–1119 (2015).
- 1156 25. Lecuit, T. & Yap, A. S. E-cadherin junctions as active mechanical integrators in tissue  
1157 dynamics. *Nat. Cell Biol.* **17**, 533–539 (2015).
- 1158 26. West, J. J. & Harris, T. J. C. Cadherin Trafficking for Tissue Morphogenesis: Control and  
1159 Consequences. *Traffic* **17**, 1233–1243 (2016).
- 1160 27. Hoffman, B. D. & Yap, A. S. Towards a Dynamic Understanding of Cadherin-Based  
1161 Mechanobiology. *Trends Cell Biol.* **25**, 803–814 (2015).
- 1162 28. Avizienyte, E., Fincham, V. J., Brunton, V. G. & Frame, M. C. Src SH3/2 domain-mediated  
1163 peripheral accumulation of Src and phospho-myosin is linked to deregulation of E-  
1164 cadherin and the epithelial-mesenchymal transition. *Mol. Biol. Cell* **15**, 2794–803 (2004).
- 1165 29. de Beco, S., Perney, J. B., Coscoy, S. & Amblard, F. Mechanosensitive adaptation of E-  
1166 cadherin turnover across adherens junctions. *PLoS One* **10**, 1–14 (2015).
- 1167 30. de Beco, S., Gueudry, C., Amblard, F. & Coscoy, S. Endocytosis is required for E-cadherin  
1168 redistribution at mature adherens junctions. *Proc. Natl. Acad. Sci. U. S. A.* **106**, 7010–5  
1169 (2009).
- 1170 31. Jurado, J., de Navascués, J. & Gorfinkiel, N.  $\alpha$ -Catenin stabilises Cadherin-Catenin  
1171 complexes and modulates actomyosin dynamics to allow pulsatile apical contraction. *J.*  
1172 *Cell Sci.* **129**, 4496–4508 (2016).
- 1173 32. Weng, M. & Wieschaus, E. Myosin-dependent remodeling of adherens junctions protects  
1174 junctions from Snail-dependent disassembly. *J. Cell Biol.* **212**, 219–229 (2016).
- 1175 33. Irvine, K. D. & Wieschaus, E. Cell intercalation during Drosophila germband extension and  
1176 its regulation by pair-rule segmentation genes. *Development* **120**, 827–41 (1994).
- 1177 34. Bertet, C., Sulak, L. & Lecuit, T. Myosin-dependent junction remodelling controls planar  
1178 cell intercalation and axis elongation. *Nature* **429**, 667–671 (2004).
- 1179 35. Blankenship, J. T., Backovic, S. T., Sanny, J. S. P., Weitz, O. & Zallen, J. a. Multicellular  
1180 rosette formation links planar cell polarity to tissue morphogenesis. *Dev. Cell* **11**, 459–70  
1181 (2006).
- 1182 36. Collinet, C., Rauzi, M., Lenne, P. & Lecuit, T. Local and tissue-scale forces drive oriented  
1183 junction growth during tissue extension. *Nat. Cell Biol.* **17**, 1247–58 (2015).
- 1184 37. Rauzi, M., Lenne, P.-F. & Lecuit, T. Planar polarized actomyosin contractile flows control  
1185 epithelial junction remodelling. *Nature* **468**, 1110–1114 (2010).
- 1186 38. Kerridge, S. *et al.* Modular activation of Rho1 by GPCR signalling imparts polarized myosin  
1187 II activation during morphogenesis. *Nat. Cell Biol.* **18**, 261–270 (2016).
- 1188 39. Rauzi, M., Verant, P., Lecuit, T. & Lenne, P.-F. Nature and anisotropy of cortical forces  
1189 orienting Drosophila tissue morphogenesis. *Nat. Cell Biol.* **10**, 1401–10 (2008).

- 1190 40. Fernandez-Gonzalez, R., Simoes, S. D. M., Röper, J.-C., Eaton, S. & Zallen, J. a. Myosin II  
1191 dynamics are regulated by tension in intercalating cells. *Dev. Cell* **17**, 736–43 (2009).
- 1192 41. Levayer, R. & Lecuit, T. Oscillation and Polarity of E-Cadherin Asymmetries Control  
1193 Actomyosin Flow Patterns during Morphogenesis. *Dev. Cell* **26**, 162–175 (2013).
- 1194 42. Bambardekar, K., Clément, R., Blanc, O., Chardès, C. & Lenne, P.-F. Direct laser  
1195 manipulation reveals the mechanics of cell contacts in vivo. *Proc. Natl. Acad. Sci.* **112**,  
1196 1416–1421 (2015).
- 1197 43. Munjal, A., Philippe, J.-M., Munro, E. & Lecuit, T. A self-organized biomechanical network  
1198 drives shape changes during tissue morphogenesis. *Nature* **524**, 351–355 (2015).
- 1199 44. Zallen, J. a & Wieschaus, E. Patterned gene expression directs bipolar planar polarity in  
1200 *Drosophila*. *Dev. Cell* **6**, 343–55 (2004).
- 1201 45. Simões, S. de M., Mainieri, A. & Zallen, J. A. Rho GTPase and Shroom direct planar  
1202 polarized actomyosin contractility during convergent extension. *J. Cell Biol.* **204**, 575–89  
1203 (2014).
- 1204 46. Hara, Y., Shagirov, M. & Toyama, Y. Cell Boundary Elongation by Non-autonomous  
1205 Contractility in Cell Oscillation. *Curr. Biol.* **26**, 2388–2396 (2016).
- 1206 47. Chiou, K. K., Hufnagel, L. & Shraiman, B. I. Mechanical stress inference for two  
1207 dimensional cell arrays. *PLoS Comput. Biol.* **8**, e1002512 (2012).
- 1208 48. Noll, N., Mani, M., Heemskerk, I., Streichan, S. J. & Shraiman, B. I. Active tension network  
1209 model suggests an exotic mechanical state realized in epithelial tissues. *Nat. Phys.* (2017).  
1210 doi:10.1038/nphys4219
- 1211 49. Yang, X. *et al.* Correlating cell shape and cellular stress in motile confluent tissues. *Proc.*  
1212 *Natl. Acad. Sci. U. S. A.* **114**, 12663–12668 (2017).
- 1213 50. Farhadifar, R., Röper, J.-C., Aigouy, B., Eaton, S. & Jülicher, F. The Influence of Cell  
1214 Mechanics, Cell-Cell Interactions, and Proliferation on Epithelial Packing. *Curr. Biol.* **17**,  
1215 2095–2104 (2007).
- 1216 51. Fernandez-Gonzalez, R. & Zallen, J. a. Oscillatory behaviors and hierarchical assembly of  
1217 contractile structures in intercalating cells. *Phys. Biol.* **8**, 045005 (2011).
- 1218 52. Yao, M. *et al.* Force-dependent conformational switch of  $\alpha$ -catenin controls vinculin  
1219 binding. *Nat. Commun.* **5**, (2014).
- 1220 53. Biswas, K. H., Hartman, K. L., Zaidel-Bar, R. & Groves, J. T. Sustained  $\alpha$ -catenin Activation  
1221 at E-cadherin Junctions in the Absence of Mechanical Force. *Biophys. J.* **111**, 1044–52  
1222 (2016).
- 1223 54. Braga, V. M. M., Machesky, L. M., Hall, A. & Hotchin, N. a. The small GTPases Rho and Rac  
1224 are required for the establishment of cadherin-dependent cell-cell contacts. *J. Cell Biol.*  
1225 **137**, 1421–31 (1997).
- 1226 55. Carramusa, L., Ballestrem, C., Zilberman, Y. & Bershadsky, A. D. Mammalian diaphanous-  
1227 related formin Dia1 controls the organization of E-cadherin-mediated cell-cell junctions. *J.*  
1228 *Cell Sci.* **120**, 3870–3882 (2007).
- 1229 56. Priya, R. *et al.* Feedback regulation through myosin II confers robustness on RhoA  
1230 signalling at E-cadherin junctions. *Nat. Cell Biol.* **17**, 1282–1293 (2015).
- 1231 57. Alatortsev, V. E., Kramerova, I. A., Frolov, M. V., Lavrov, S. A. & Westphal, E. D. Vinculin  
1232 gene is non-essential in *Drosophila melanogaster*. *FEBS Lett.* **413**, 197–201 (1997).
- 1233 58. Vanderleest, T. E. *et al.* Vertex sliding drives intercalation by radial coupling of adhesion  
1234 and actomyosin networks during *Drosophila* germband extension. *Elife* **7**, 1–23 (2018).
- 1235 59. Ejsmont, R. K., Sarov, M., Winkler, S., Lipinski, K. A. & Tomancak, P. A toolkit for high-  
1236 throughput, cross-species gene engineering in *Drosophila*. *Nat. Methods* **6**, 435–437

- 1237 (2009).
- 1238 60. Huang, J., Zhou, W., Dong, W., Watson, A. M. & Hong, Y. Directed, efficient, and versatile  
1239 modifications of the Drosophila genome by genomic engineering. *Proc. Natl. Acad. Sci.*  
1240 **106**, 8284–8289 (2009).
- 1241 61. Pilot, F., Philippe, J.-M., Lemmers, C., Chauvin, J.-P. & Lecuit, T. Developmental control of  
1242 nuclear morphogenesis and anchoring by charleston, identified in a functional genomic  
1243 screen of Drosophila cellularisation. *Development* **133**, 711–23 (2006).
- 1244 62. Cavey, M. & Lecuit, T. Imaging cellular and molecular dynamics in live embryos using  
1245 fluorescent proteins. *Methods Mol. Biol.* **420**, 219–38 (2008).
- 1246 63. Campos-Ortega, J. A. & Hartenstein, V. *The Embryonic Development of Drosophila*  
1247 *melanogaster*. **86**, (Springer Berlin Heidelberg, 1985).
- 1248 64. Aigouy, B. *et al.* Cell Flow Reorients the Axis of Planar Polarity in the Wing Epithelium of  
1249 Drosophila. *Cell* **142**, 773–786 (2010).
- 1250 65. Brodland, G. W. *et al.* Video force microscopy reveals the mechanics of ventral furrow  
1251 invagination in Drosophila. *Proc. Natl. Acad. Sci. U. S. A.* **107**, 22111–6 (2010).
- 1252 66. Ishihara, S. & Sugimura, K. Bayesian inference of force dynamics during morphogenesis. *J.*  
1253 *Theor. Biol.* **313**, 201–11 (2012).
- 1254

## 1255 **Acknowledgements**

1256 We thank members of Lecuit and Lenne group for discussions throughout the course of this  
1257 project and for providing a stimulating environment, Claire Chardes (Lenne group) and  
1258 Claudio Collinet (Lecuit group) for assistance with laser ablation experiments, IBDM imaging  
1259 facility for assistance with maintenance of the Microscopes, FlyBase for maintaining curated  
1260 database and Bloomington fly facility for providing transgenic flies.

1261  
1262 GK was supported by PhD fellowship from the LabEx INFORM (ANR-11-LABX-0054) and of  
1263 the A\*MIDEX project (ANR-11-IDEX-0001-02), funded by the ‘Investissements d’Avenir  
1264 French Government program’. We also thank NCBS-TIFR for a bridging post-doctoral  
1265 fellowship for GK, hosted in the laboratory of Satyajit Mayor during the completion of this  
1266 manuscript. We acknowledge France-BioImaging infra-structure supported by the French  
1267 National Research Agency (ANR-10-INBS-04-01, «Investments for the future»).

1268

## 1269 **Author contributions**

1270 G.K., X.Y., M.M., P.F.L. and T.L. planned the project. G.K. did the experiments, X.Y. performed  
1271 the mechanical inference studies, J.M.P. did the constructs. G.K. and X.Y. did the analysis. All  
1272 authors discussed the data. G.K., X.Y., and T.L. wrote the manuscript and all authors gave  
1273 comments on the manuscript.

1274

1275 **Figure1: Regulation of Vinculin localization**

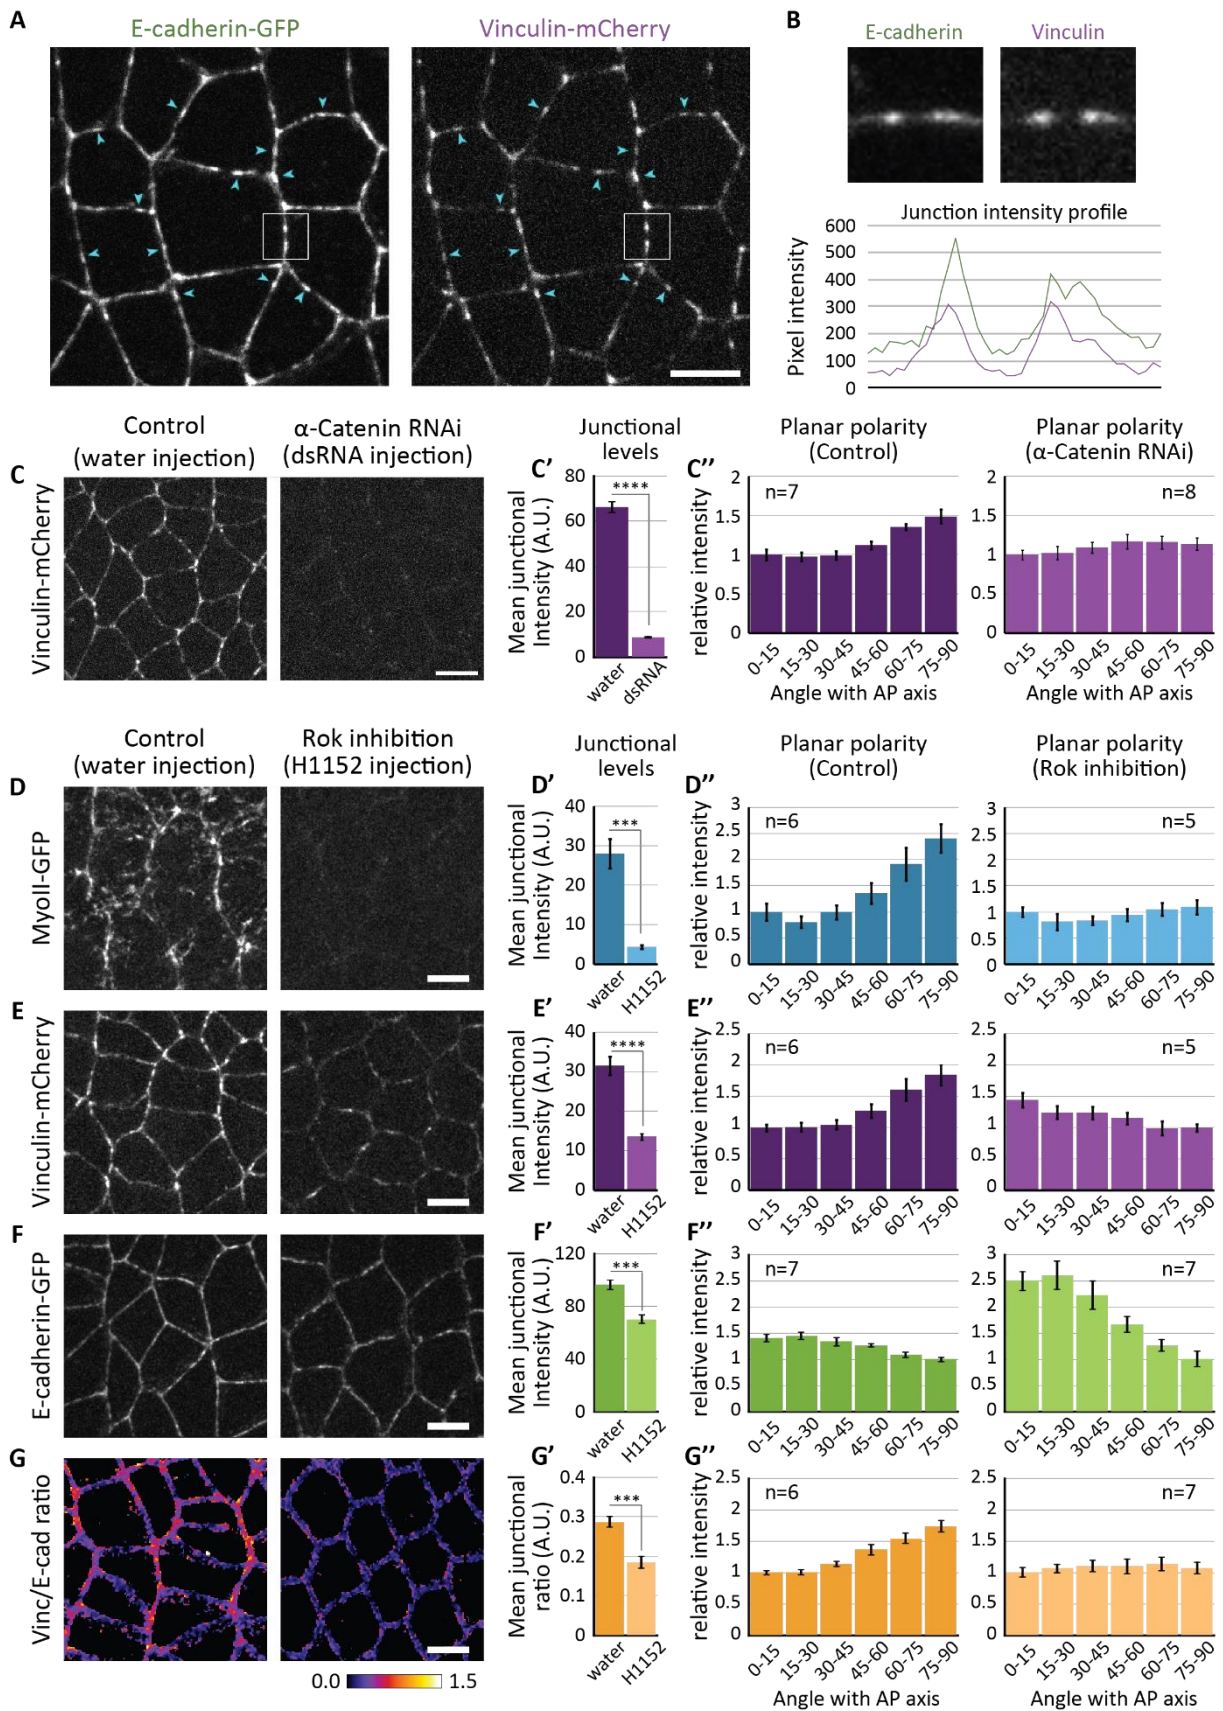

1276

1277 **Figure2: Vinc/E-cad ratio correlates with the junctional tension**

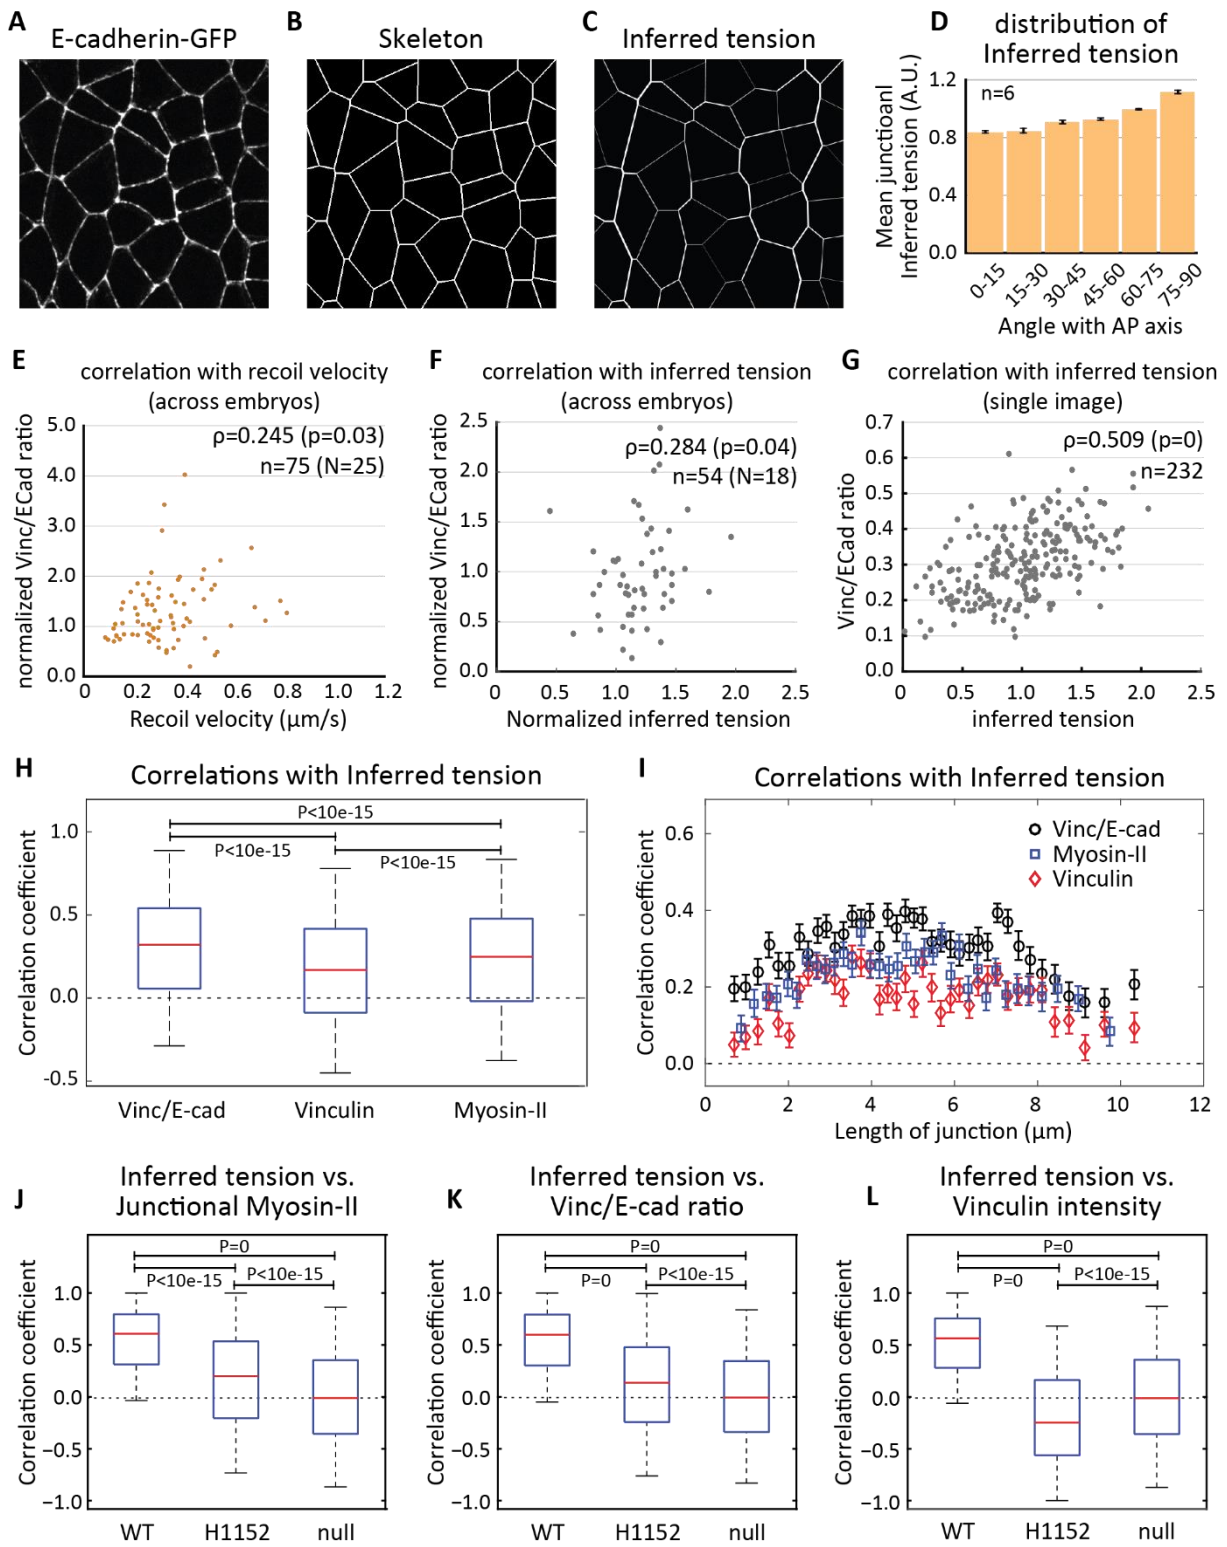

1278

1279

**Figure3: Vinc/E-cad ratio represents the load on adhesion complexes.**

**A** Schematic showing changes in Vinc/ECad ratio upon E-Cadherin over-expression

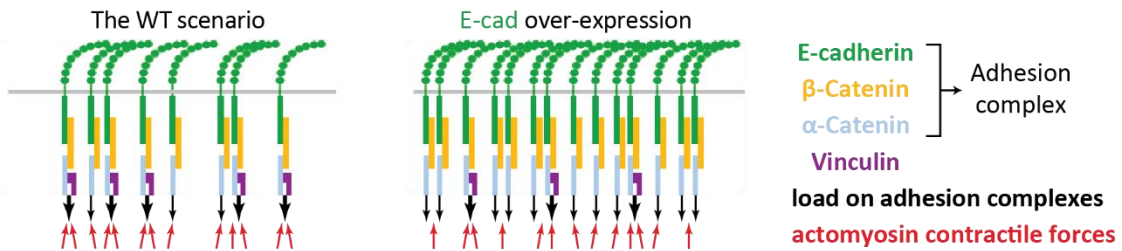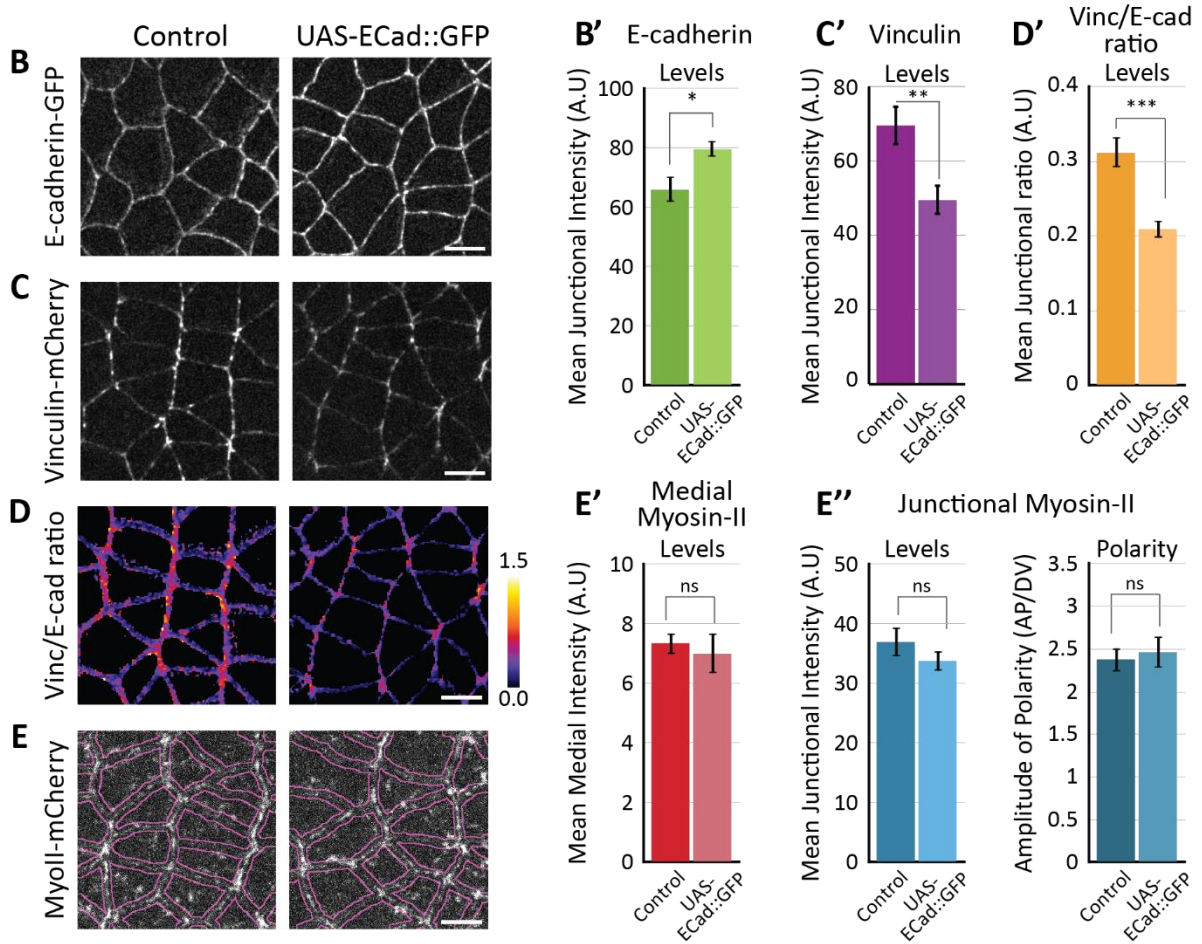

1280

1281 **Figure4: Medial Myosin tunes the levels of Vinc/E-cad ratio, while junctional Myosin tunes**  
 1282 **its planar polarized distribution**

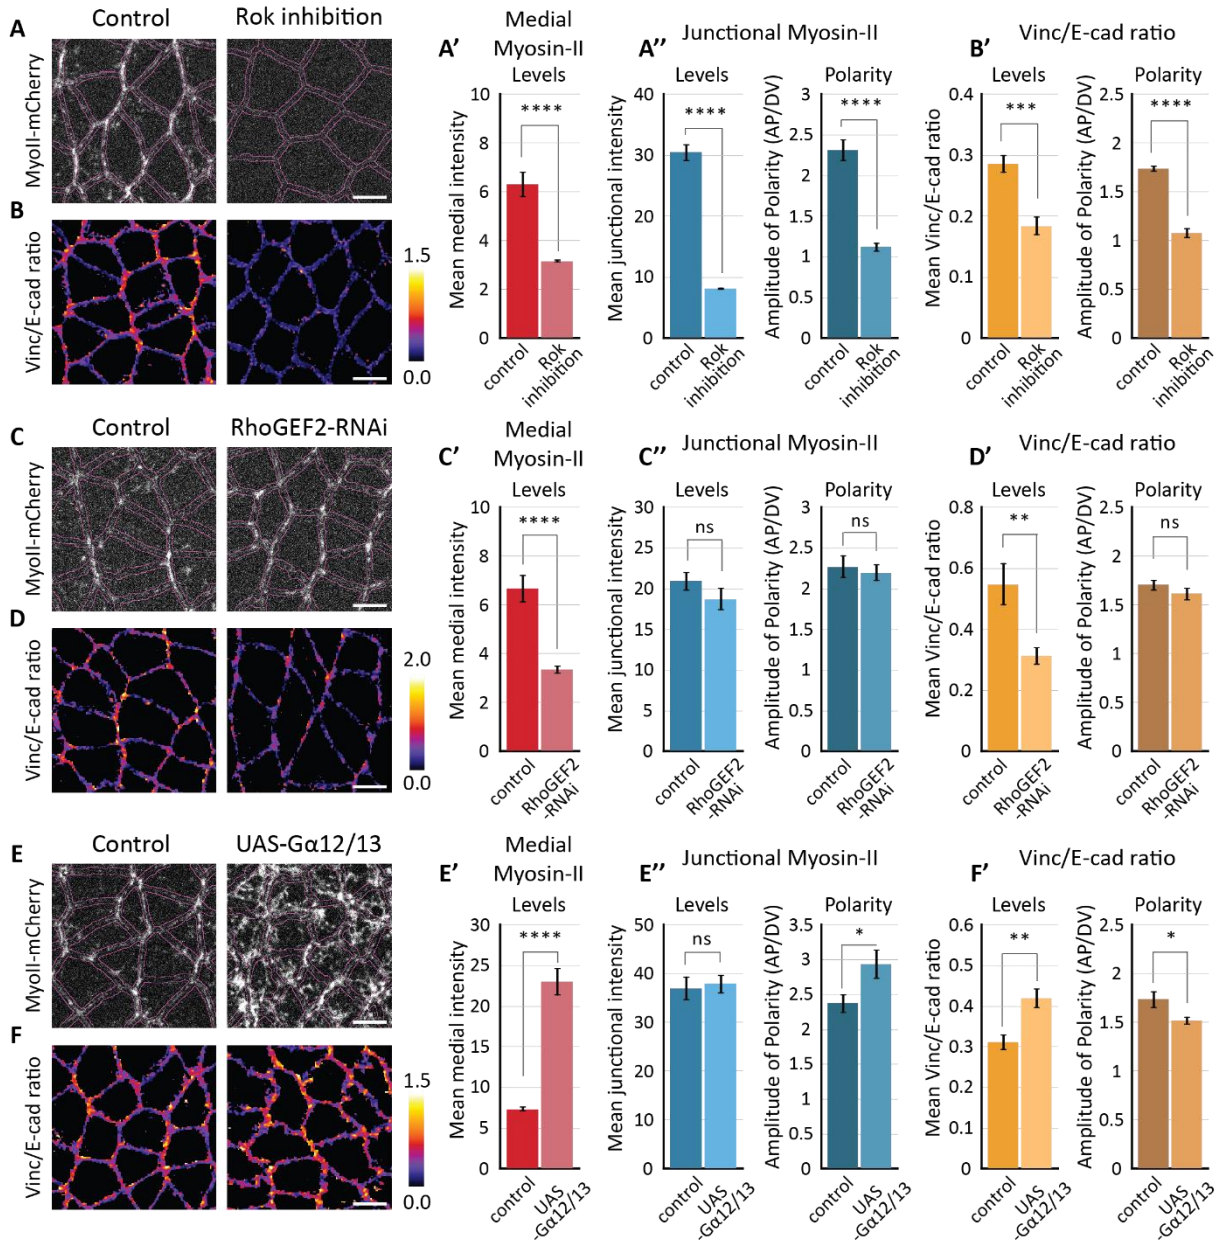

1283



1284 **Figure5: Medial Myosin-II tunes the levels of junctional E-cadherin**

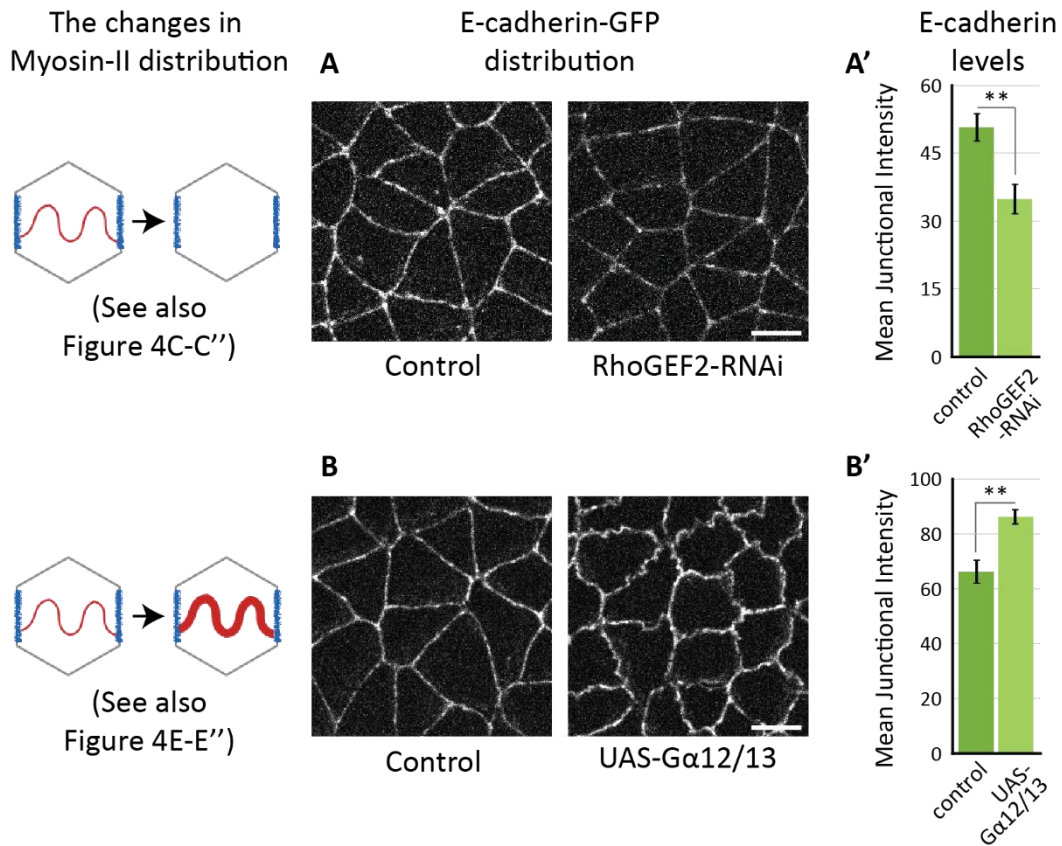

1285

1286 **Figure6: Increase in shear stress reduces the levels of junctional E-cadherin**

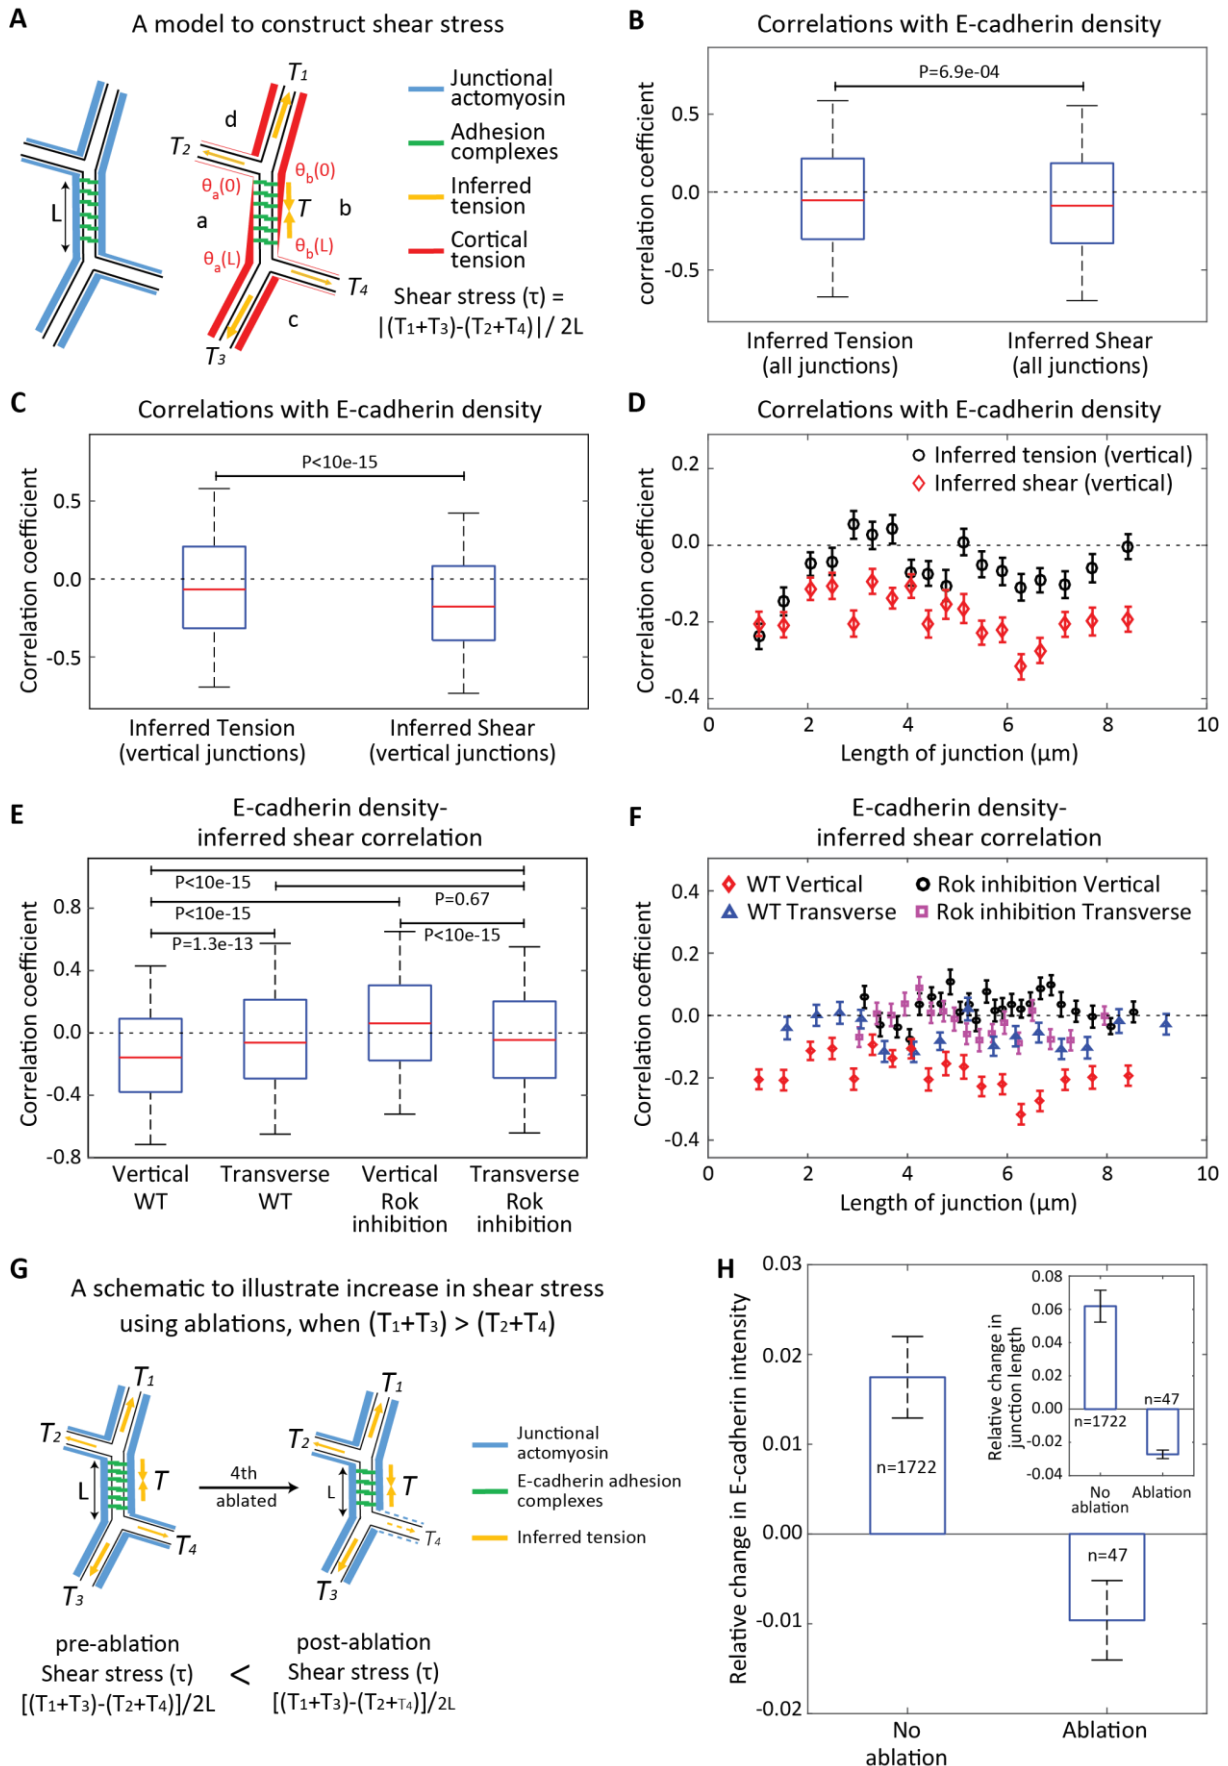

1288  
1289

**Supplementary Figure1: Cellular sources of tension and the distribution of Vinculin in the embryonic ectoderm**

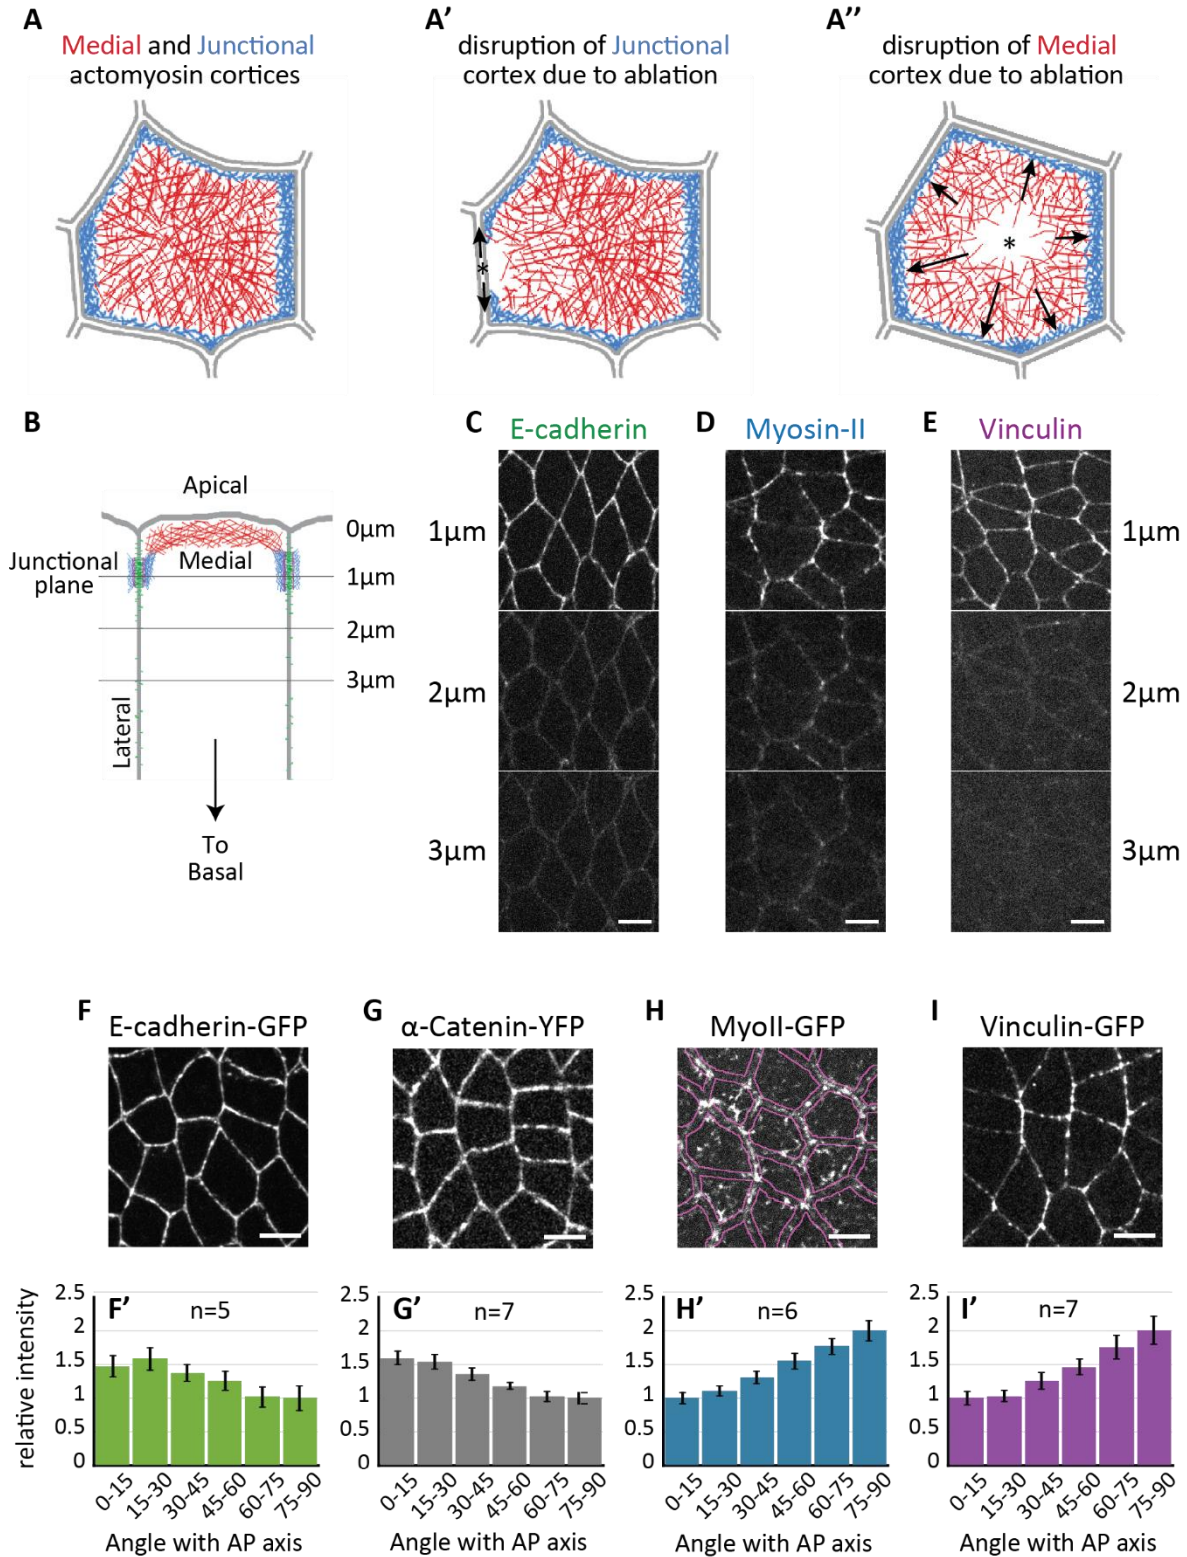

1290

1291 **Supplementary Figure2: Additional Correlation analyses**

**A**

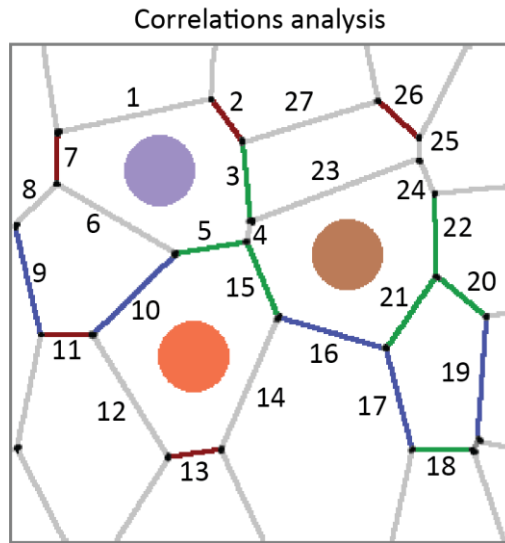

**Conditional correlation:**

Correlation among junctions of same length  
 (2, 7, 11, 13, 26), (3, 5, 15, 18, 20, 21, 22),  
 (9, 10, 16, 17, 19), etc

**Local correlation:**

Correlation among junctions of same cell  
 (1, 2, 3, 4, 5, 6, 7), (4, 15, 16, 21, 22, 24, 23),  
 (5, 10, 12, 13, 14, 15), etc

**B**

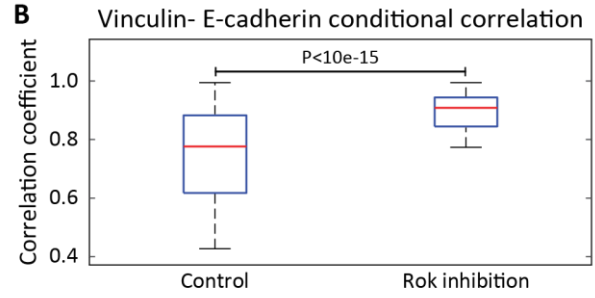

**C**

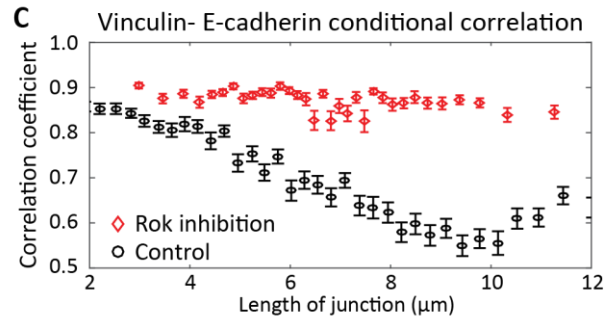

**D**

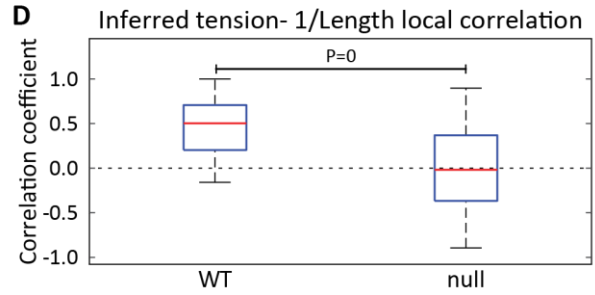

1292

1293 **Supplementary Figure3: Additional ablation and mechanical inference analyses**

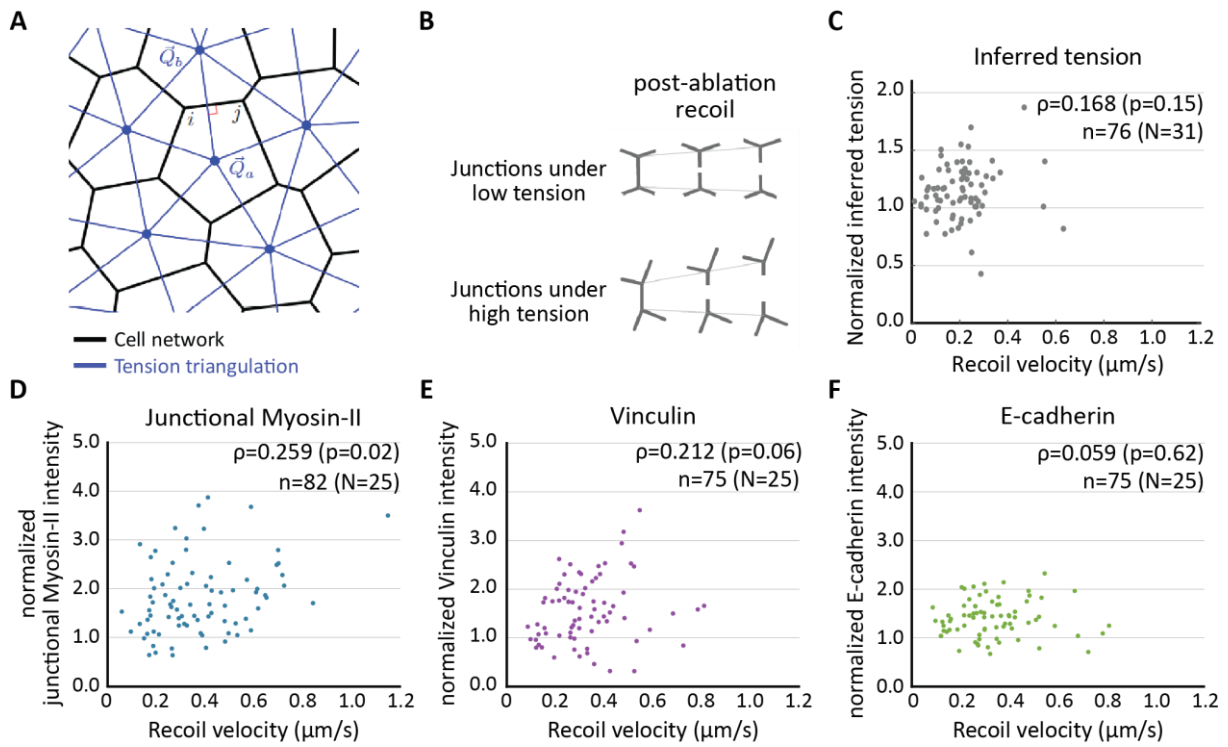

1294

1295 **Supplementary Figure4: Additional ablation analyses to estimate the distribution of**  
1296 **junctional tension**

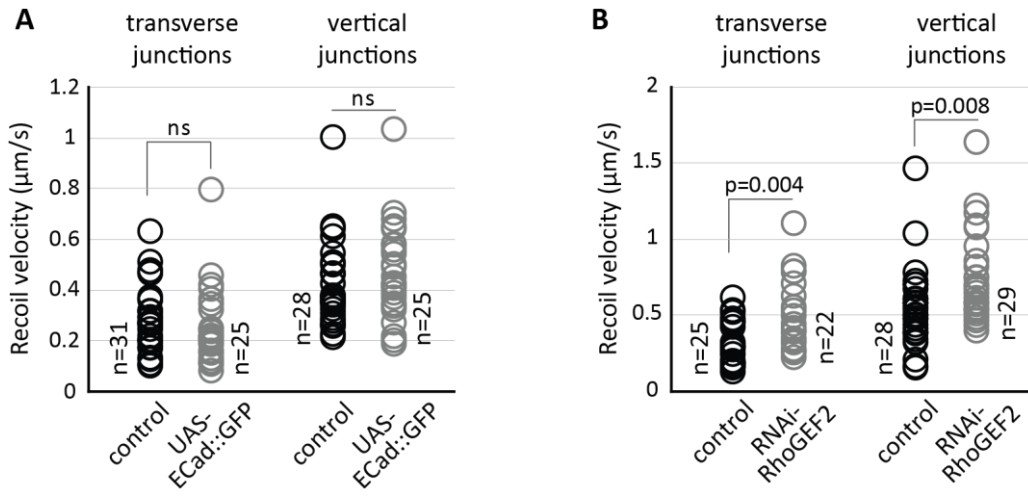

1297

1298 **Supplementary Figure5: Supporting information for 'pixel analysis' of Vinc/E-cad ratio**

**A** Procedure employed to estimate Signal-to-noise ratio for individual pixels using intensity of the neighboring pixels in a 3x3 box

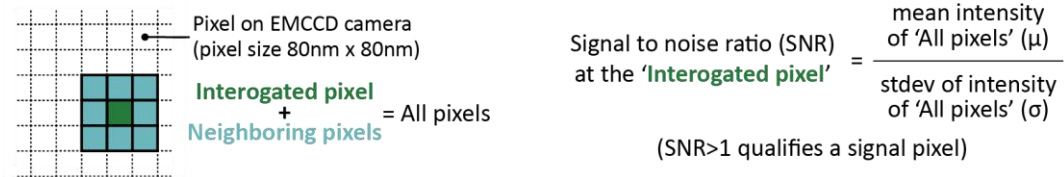

**B** Conversion from E-cadherin-GFP intensity image to SNR image (for individual z-slices)

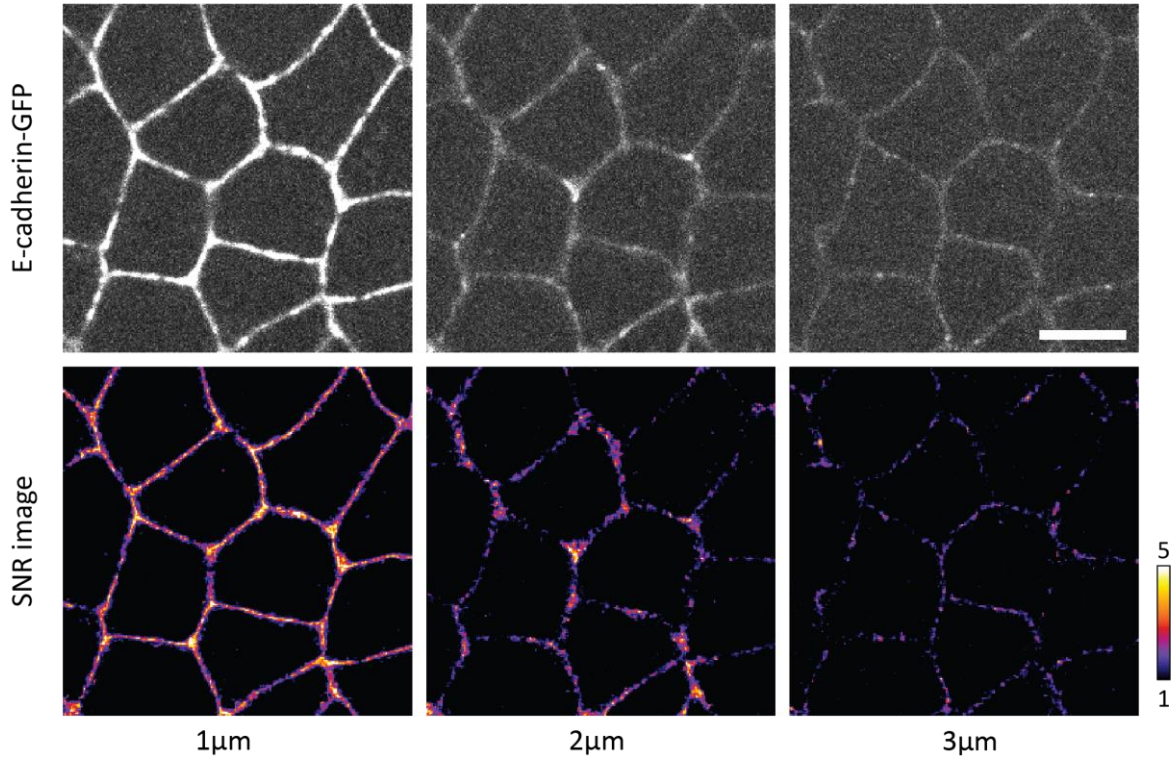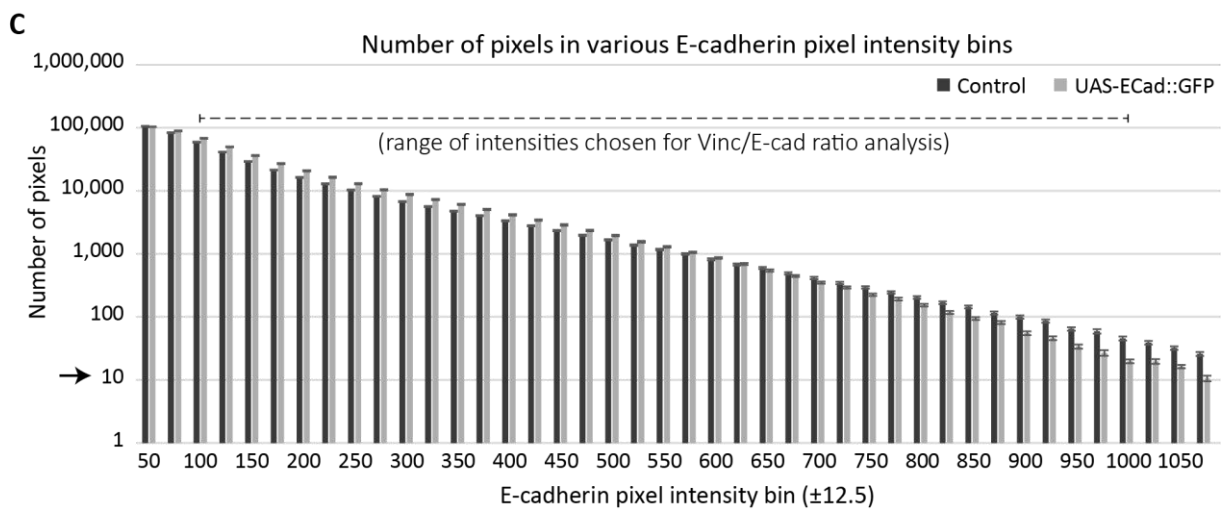

1299

1300 **Supplementary Figure6: Supporting information for image analysis workflow**

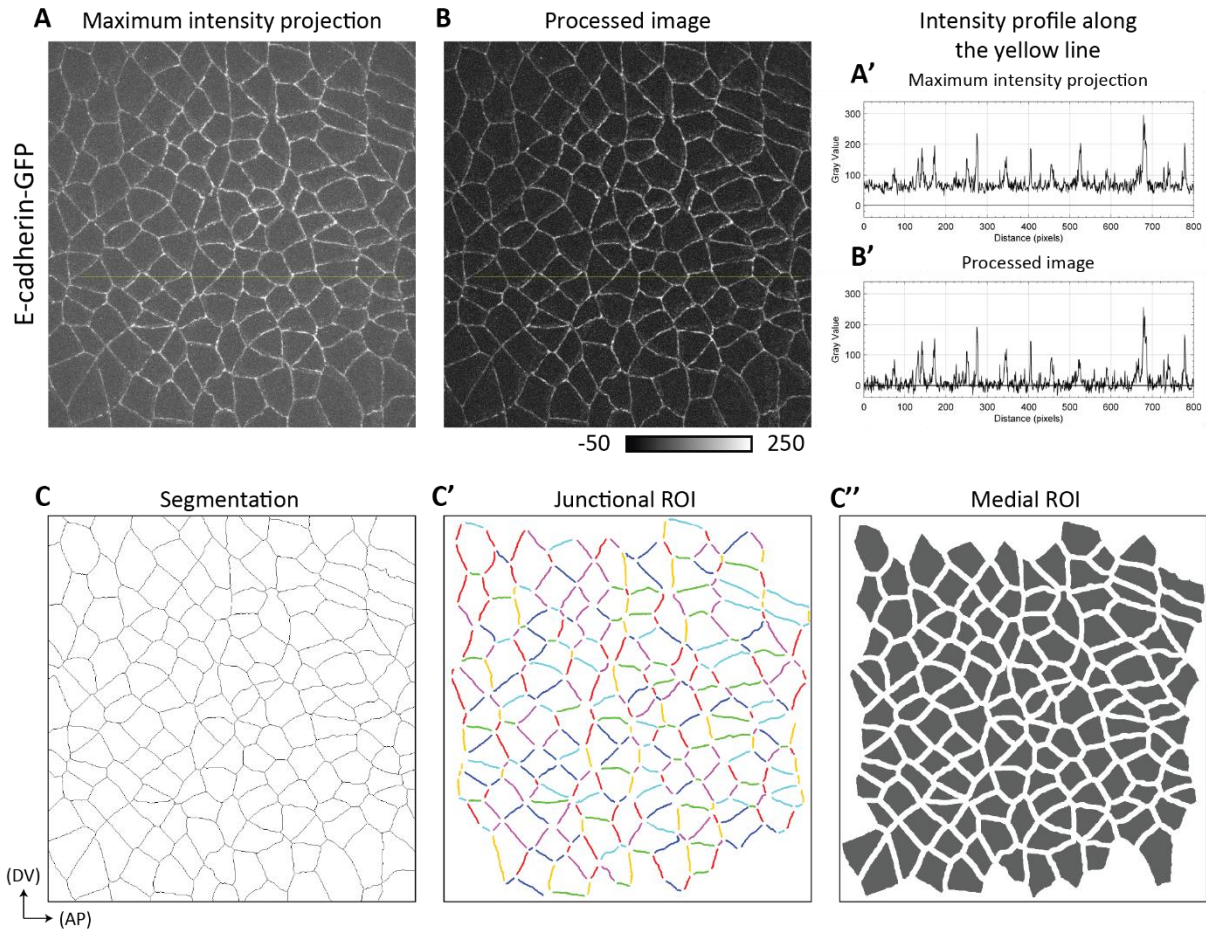

**D** Follow-up from C': Segregate 'line density' values ( $\rho$ ) for junctions ( $j$ ) based on their angle relative to the AP axis for each embryo (E). Using that, calculate 'averaged line density' (ALD) and 'planar cell polarity' (PCP) for each of 'N' embryos. These values are used to calculate 'mean junctional intensity' and 'amplitude of polarity'. The same values are used to estimate the related SEM values.

| Angle bins →                   | (AP)            |                 |                 |                 |                 | (DV)            |
|--------------------------------|-----------------|-----------------|-----------------|-----------------|-----------------|-----------------|
|                                | 00-15           | 15-30           | 30-45           | 45-60           | 60-75           | 75-90           |
|                                | $\rho(j_a)$     | $\rho(j_b)$     | $\rho(j_d)$     | $\rho(j_r)$     | $\rho(j_g)$     | $\rho(j_n)$     |
|                                | $\rho(j_b)$     | $\rho(j_i)$     | $\rho(j_e)$     | $\rho(j_j)$     | $\rho(j_l)$     | $\rho(j_m)$     |
|                                | $\rho(j_p)$     | $\rho(j_o)$     | $\rho(j_i)$     | $\rho(j_k)$     | $\rho(j_w)$     | $\rho(j_n)$     |
|                                | $\rho(j_q)$     | $\rho(j_r)$     | .               | $\rho(j_l)$     | $\rho(j_y)$     | $\rho(j_x)$     |
|                                | $\rho(j_s)$     | .               | .               | $\rho(j_i)$     | .               | $\rho(j_z)$     |
|                                | .               | .               | .               | .               | .               | .               |
| Averages for each → categories | $Avg_{(00-15)}$ | $Avg_{(15-30)}$ | $Avg_{(30-45)}$ | $Avg_{(45-60)}$ | $Avg_{(60-75)}$ | $Avg_{(75-90)}$ |

$$ALD(E_1) = (Avg_{(00-15)} + Avg_{(15-30)} + \dots + Avg_{(75-90)})/6 \rightarrow \text{mean junctional intensity} = (ALD(E_1) + ALD(E_2) + \dots + ALD(E_N)) / N$$

$$PCP_{DV/AP}(E_1) = Avg_{(75-90)} / Avg_{(00-15)} \rightarrow \text{amplitude of polarity}_{DV/AP} = (PCP_{DV/AP}(E_1) + PCP_{DV/AP}(E_2) + \dots + PCP_{DV/AP}(E_N)) / N$$

**E** Follow-up from C'': Pool 'area density' values (R) for 'n' number of cells per image. Using that, calculate 'averaged area density' (AAD) for each of 'N' embryos (E). These values are used to calculate 'mean medial intensity'. The same values are used to estimate the related SEM values.

$$AAD(E_1) = (R_1 + R_2 + \dots + R_n) / n \rightarrow \text{mean medial intensity} = (AAD(E_1) + AAD(E_2) + \dots + AAD(E_N)) / N$$

1301
